# Supplementary material
Source: HighWire-hosted journal article supplement (https://oem.bmj.com/highwire/filestream/157470/field_highwire_adjunct_files/2/OEM_Appendix_C_052571.xls)
Supplement: OEM_Appendix_C_052571.xls [file OEM_Appendix_C_052571.xls]

## Sheet: sic_OR_female_TCC_highrisk_0407
Appendix C. Risk of Bladder Cancer by Industry (SIC), Men and Women, New England, 2001-2004 (a)
SIC Code	Industry	Men					Women
		Cases	Controls	OR	Lower CI	Upper CI	Cases	Controls	OR	Lower CI	Upper CI
01	AGRICULTURAL PRODUCTION, CROPS	39	49	1.0291	0.64823	1.63385	6	4	2.9093	0.691475	12.2413
011	CASH GRAINS	0	1	NA	--	--	0	0	NA	--	--
0119	CASH GRAINS, NEC	0	1	NA	--	--	0	0	NA	--	--
013	FIELD CROPS, EXCEPT CASH GRAINS	12	11	1.3105	0.540854	3.17577	2	1	6.758	0.513098	89.0117
0132	TOBACCO	2	0	NA	--	--	0	0	NA	--	--
0134	IRISH POTATOES	9	10	1.0795	0.40887	2.85042	2	1	6.758	0.513098	89.0117
0139	FIELD CROPS, EXCEPT CASH GRAINS, NEC	1	1	1.6714	0.0712256	39.2261	0	0	NA	--	--
016	VEGETABLES AND MELONS	2	6	0.5307	0.101183	2.78396	0	0	NA	--	--
0161	VEGETABLES AND MELONS	2	6	0.5307	0.101183	2.78396	0	0	NA	--	--
017	FRUITS AND TREE NUTS	8	9	0.7883	0.281028	2.21164	0	2	NA	--	--
0171	BERRY CROPS	4	5	0.8885	0.204614	3.85819	0	0	NA	--	--
0175	DECIDUOUS TREE FRUITS	4	3	0.9562	0.201271	4.54332	0	2	NA	--	--
0179	FRUITS AND TREE NUTS, NEC	0	1	NA	--	--	0	0	NA	--	--
018	HORTICULTURAL SPECIALTIES	3	3	2.4271	0.442425	13.3153	0	0	NA	--	--
0181	ORNAMENTAL NURSERY PRODUCTS	3	3	2.4271	0.442425	13.3153	0	0	NA	--	--
019	GENERAL FARMS PRIMARILY CROP	14	21	1.013	0.490379	2.09275	4	1	9.055	0.751802	109.062
0191	GENERAL FARMS, PRIMARILY CROP	14	21	1.013	0.490379	2.09275	4	1	9.055	0.751802	109.062
02	AGRICULTURAL PRODUCTION, LIVESTOCK	71	108	0.7441	0.528821	1.0473	6	7	1.0853	0.306049	3.84884
021	LIVESTOCK, EXCEPT DAIRY AND POULTRY	6	9	0.689	0.221784	2.14055	2	0	NA	--	--
0212	BEEF CATTLE, EXCEPT FEEDLOTS	3	3	1.066	0.177776	6.39217	1	0	NA	--	--
0213	HOGS	0	1	NA	--	--	0	0	NA	--	--
0214	SHEEP AND GOATS	0	1	NA	--	--	1	0	NA	--	--
0219	GENERAL LIVESTOCK, NEC	2	5	0.3259	0.056767	1.87145	0	0	NA	--	--
024	DAIRY FARMS	52	83	0.7009	0.473992	1.0365	4	3	1.6882	0.322484	8.83782
0241	DAIRY FARMS	52	83	0.7009	0.473992	1.0365	4	3	1.6882	0.322484	8.83782
025	POULTRY AND EGGS	11	15	0.7978	0.344726	1.84647	0	3	NA	--	--
0251	BROILER, FRYER, AND ROASTER CHICKENS	3	4	1.091	0.222063	5.36107	0	1	NA	--	--
0252	CHICKEN EGGS	8	11	0.7138	0.268763	1.8959	0	1	NA	--	--
0253	TURKEYS AND TURKEY EGGS	0	0	NA	--	--	0	0	NA	--	--
0254	POULTRY HATCHERIES	0	1	NA	--	--	0	1	NA	--	--
027	ANIMAL SPECIALTIES	6	2	5.0807	0.986458	26.168	0	0	NA	--	--
0272	HORSES AND OTHER EQUINES	4	2	3.7167	0.652799	21.162	0	0	NA	--	--
0273	ANIMAL AQUACULTURE	1	0	NA	--	--	0	0	NA	--	--
0279	ANIMAL SPECIALTIES, NEC	1	0	NA	--	--	0	0	NA	--	--
029	GENERAL FARMS PRIMARILY LIVESTOCK ANIMAL SPECIALTIES	4	5	1.1196	0.285164	4.39583	0	1	NA	--	--
0291	GENERAL FARMS, PRIMARILY ANIMAL	4	5	1.1196	0.285164	4.39583	0	1	NA	--	--
07	AGRICULTURAL SERVICES	30	20	1.8678	0.998516	3.49416	4	8	0.6999	0.188995	2.59237
072	CROP SERVICES	2	5	0.2962	0.0489041	1.79473	0	0	NA	--	--
0721	CROP PLANTING AND PROTECTING	0	1	NA	--	--	0	0	NA	--	--
0722	CROP HARVESTING	1	0	NA	--	--	0	0	NA	--	--
0723	CROP PREPARATION SERVICES FOR MARKET	1	4	0.1877	0.0179521	1.96332	0	0	NA	--	--
074	VETERINARY SERVICES	1	0	NA	--	--	1	2	0.5654	0.0339074	9.43127
0742	VETERINARY SERVICES, SPECIALTIES	1	0	NA	--	--	1	2	0.5654	0.0339074	9.43127
075	ANIMAL SERVICES, EXCEPT VETERINARY	2	1	3.7197	0.289524	47.7904	2	3	1.291	0.207153	8.04592
0751	LIVESTOCK SERVICES, EXCEPT VETERINARY	1	1	2.5883	0.144838	46.2552	1	1	1.7783	0.10607	29.8146
0752	ANIMAL SPECIALTY SERVICES	1	0	NA	--	--	1	2	1.0213	0.0884937	11.789
076	FARM LABOR AND MANAGEMENT SERVICES	1	0	NA	--	--	0	0	NA	--	--
0762	FARM MANAGEMENT SERVICES	1	0	NA	--	--	0	0	NA	--	--
078	LANDSCAPE AND HORTICULTURAL SERVICES	25	14	2.3561	1.15094	4.82335	1	3	0.3412	0.0310342	3.75305
0781	LANDSCAPE COUNSELING AND PLANNING	12	10	1.7061	0.687824	4.2319	0	1	NA	--	--
0782	LAWN AND GARDEN SERVICES	8	2	6.3064	1.18701	33.5054	1	1	0.595	0.0356282	9.93859
0783	ORNAMENTAL SHRUB AND TREE SERVICES	6	2	2.5846	0.498499	13.4007	0	1	NA	--	--
08	FORESTRY	3	3	1.671	0.309617	9.01928	0	0	NA	--	--
081	TIMBER TRACTS	1	2	0.7302	0.0630805	8.45451	0	0	NA	--	--
0811	TIMBER TRACTS	1	2	0.7302	0.0630805	8.45451	0	0	NA	--	--
083	FOREST NURSERIES AND GATHERING OF FOREST PRODUCTS	0	1	NA	--	--	0	0	NA	--	--
0831	FOREST PRODUCTS	0	1	NA	--	--	0	0	NA	--	--
085	FORESTRY SERVICES	3	0	NA	--	--	0	0	NA	--	--
0851	FORESTRY SERVICES	3	0	NA	--	--	0	0	NA	--	--
09	FISHING, HUNTING, AND TRAPPING	21	12	1.5755	0.725194	3.42322	0	2	NA	--	--
091	COMMERCIAL FISHING	20	12	1.4444	0.659159	3.16537	0	2	NA	--	--
0912	FINFISH	11	7	1.3786	0.502861	3.77959	0	0	NA	--	--
0913	SHELLFISH	9	9	0.8747	0.31928	2.3964	0	2	NA	--	--
092	FISH HATCHERIES AND PRESERVES	1	0	NA	--	--	0	0	NA	--	--
0921	FISH HATCHERIES AND PRESERVES	1	0	NA	--	--	0	0	NA	--	--
10	METAL MINING	0	6	NA	--	--	0	0	NA	--	--
102	COPPER ORES	0	3	NA	--	--	0	0	NA	--	--
1021	COPPER ORES	0	3	NA	--	--	0	0	NA	--	--
106	FERROALLOY ORES, EXCEPT VANADIUM	0	3	NA	--	--	0	0	NA	--	--
1061	FERROALLOY ORES, EXCEPT VANADIUM	0	3	NA	--	--	0	0	NA	--	--
12	COAL MINING	0	1	NA	--	--	0	0	NA	--	--
124	COAL MINING SERVICES	0	1	NA	--	--	0	0	NA	--	--
1241	COAL MINING SERVICES	0	1	NA	--	--	0	0	NA	--	--
13	OIL AND GAS EXTRACTION	1	0	NA	--	--	0	0	NA	--	--
138	OIL AND GAS FIELD SERVICES	1	0	NA	--	--	0	0	NA	--	--
1389	OIL AND GAS FIELD SERVICES, NEC	1	0	NA	--	--	0	0	NA	--	--
14	NONMETALLIC MINERALS, EXCEPT FUELS	9	11	0.6508	0.250734	1.68944	0	0	NA	--	--
141	DIMENSION STONE	0	4	NA	--	--	0	0	NA	--	--
1411	DIMENSION STONE	0	4	NA	--	--	0	0	NA	--	--
142	CRUSHED AND BROKEN STONE, INCLUDING RIPRAP	1	2	0.6965	0.0618053	7.85122	0	0	NA	--	--
1422	CRUSHED AND BROKEN LIMESTONE	0	2	NA	--	--	0	0	NA	--	--
144	SAND AND GRAVEL	5	1	3.9276	0.415558	37.1231	0	0	NA	--	--
1442	CONSTRUCTION SAND AND GRAVEL	3	1	2.7359	0.247108	30.2922	0	0	NA	--	--
145	CLAY, CERAMIC AND REFRACTORY MINERALS	0	1	NA	--	--	0	0	NA	--	--
1459	CLAY AND RELATED MINERALS, NEC	0	1	NA	--	--	0	0	NA	--	--
149	MISCELLANEOUS NONMETALLIC MINERALS, EXCEPT FUELS	3	3	0.7625	0.129106	4.50404	0	0	NA	--	--
1499	MISCELLANEOUS NONMETALLIC MINERALS	3	3	0.7625	0.129106	4.50404	0	0	NA	--	--
15	GENERAL BUILDING CONTRACTORS	89	124	0.7587	0.557438	1.03266	5	5	1.1398	0.300357	4.32564
152	GENERAL BUILDING CONTRACTORS-RESIDENTIAL BUILDINGS	59	83	0.7865	0.543039	1.13919	4	2	2.1725	0.349936	13.4887
1521	SINGLE-FAMILY HOUSING CONSTRUCTION	51	72	0.7832	0.527626	1.16274	4	1	4.4224	0.425936	45.9185
1522	RESIDENTIAL CONSTRUCTION, NEC	0	3	NA	--	--	0	0	NA	--	--
154	GENERAL BUILDING CONTRACTORS-NONRESIDENTIAL BUILDINGS	23	32	0.6761	0.378286	1.20865	1	1	1.0119	0.0587847	17.42
1541	INDUSTRIAL BUILDINGS AND WAREHOUSES	7	10	0.6418	0.227141	1.81365	1	0	NA	--	--
1542	NONRESIDENTIAL CONSTRUCTION, NEC	7	10	0.5559	0.199167	1.55175	0	0	NA	--	--
16	HEAVY CONSTRUCTION CONTRACTORS	91	93	1.048	0.757276	1.45059	1	2	0.554	0.0454581	6.75201
161	HIGHWAY STREET CONSTRUCTION, EXCEPT ELEVATED HIGHWAYS	67	64	1.1711	0.801033	1.71217	1	1	0.7956	0.0487923	12.9755
1611	HIGHWAY AND STREET CONSTRUCTION	67	64	1.1711	0.801033	1.71217	1	1	0.7956	0.0487923	12.9755
162	HEAVY CONSTRUCTION, EXCEPT HGHWAY STREET CONSTRUCTION	24	23	1.128	0.601459	2.11567	0	0	NA	--	--
1622	BRIDGE, TUNNEL AND ELEVATED HIGHWAY	7	7	0.7448	0.239647	2.31537	0	0	NA	--	--
1623	WATER, SEWER AND UTILITY LINES	5	8	0.5846	0.171263	1.99601	0	0	NA	--	--
1629	HEAVY CONSTRUCTION, NEC	13	9	2.0416	0.815912	5.1087	0	0	NA	--	--
17	SPECIAL TRADE CONTRACTORS	142	126	1.1072	0.837651	1.46356	7	2	4.5238	0.760577	26.9076
171	PLUMBING, HEATING AND AIR-CONDITIONING	34	24	1.0367	0.591293	1.81776	1	1	0.4081	0.0220181	7.56486
1711	PLUMBING, HEATING, AIR-CONDITIONING	34	24	1.0367	0.591293	1.81776	1	1	0.4081	0.0220181	7.56486
172	PAINTING AND PAPER HANGING	13	13	1.1121	0.482096	2.56571	2	0	NA	--	--
1721	PAINTING AND PAPER HANGING	13	13	1.1121	0.482096	2.56571	2	0	NA	--	--
173	ELECTRICAL WORK	14	14	0.951	0.428249	2.11208	1	0	NA	--	--
1731	ELECTRICAL WORK	14	14	0.951	0.428249	2.11208	1	0	NA	--	--
174	MASONRY/STONEWORK/TILESETTING/PLASTERING	19	16	1.3771	0.674558	2.81142	0	0	NA	--	--
1741	MASONRY AND OTHER STONEWORK	12	9	1.4839	0.588703	3.74072	0	0	NA	--	--
1742	PLASTERING, DRYWALL AND INSULATION	6	5	1.6757	0.471042	5.96158	0	0	NA	--	--
1743	TERRAZZO, TILE, MARBLE AND MOSAIC WORK	1	2	0.4184	0.0359635	4.86845	0	0	NA	--	--
175	CARPENTRY AND FLOOR WORK	30	33	0.9044	0.527979	1.54927	1	0	NA	--	--
1751	CARPENTRY WORK	26	30	0.9077	0.512886	1.60679	1	0	NA	--	--
1752	FLOOR LAYING AND FLOOR WORK, NEC	4	4	0.7358	0.171357	3.16	0	0	NA	--	--
176	ROOFING, SIDING AND SHEET METAL WORK	12	10	1.13	0.46126	2.76836	0	0	NA	--	--
1761	ROOFING, SIDING AND SHEET METAL WORK	12	10	1.13	0.46126	2.76836	0	0	NA	--	--
177	CONCRETE WORK	10	11	0.8178	0.325246	2.0565	0	0	NA	--	--
1771	CONCRETE WORK	10	11	0.8178	0.325246	2.0565	0	0	NA	--	--
178	WATER WELL DRILLING	6	3	1.6789	0.38423	7.33625	0	0	NA	--	--
1781	WATER WELL DRILLING	6	3	1.6789	0.38423	7.33625	0	0	NA	--	--
179	MISCELLANEOUS SPECIAL TRADE CONTRACTORS	18	18	1.0348	0.511882	2.09195	2	0	NA	--	--
1791	STRUCTURAL STEEL ERECTION	4	3	1.5377	0.322005	7.34352	0	0	NA	--	--
1794	EXCAVATION WORK	8	8	0.9276	0.316907	2.71553	1	0	NA	--	--
1795	WRECKING AND DEMOLITION WORK	1	2	1.1985	0.101936	14.0926	1	0	NA	--	--
1796	INSTALLING BUILDING EQUIPMENT, NEC	0	2	NA	--	--	0	0	NA	--	--
1799	SPECIAL TRADE CONTRACTORS, NEC	6	3	1.9174	0.464467	7.91598	0	0	NA	--	--
20	FOOD AND KINDRED PRODUCTS	58	73	0.7708	0.525945	1.12987	8	12	0.8098	0.30185	2.17292
201	MEAT PRODUCTS	11	4	2.7997	0.837237	9.36237	1	2	0.3888	0.0295528	5.11519
2011	MEAT PACKING PLANTS	4	0	NA	--	--	0	0	NA	--	--
2013	SAUSAGES AND OTHER PREPARED MEATS	3	1	3.1881	0.297735	34.1392	0	0	NA	--	--
2015	POULTRY SLAUGHTERING AND PROCESSING	4	3	1.4226	0.283465	7.14044	1	2	0.3888	0.0295528	5.11519
202	DAIRY PRODUCTS	8	16	0.4068	0.161576	1.02429	2	0	NA	--	--
2022	CHEESE, NATURAL AND PROCESSED	0	6	NA	--	--	0	0	NA	--	--
2023	DRY, CONDENSED, EVAPORATED PRODUCTS	0	1	NA	--	--	0	0	NA	--	--
2024	ICE CREAM AND FROZEN DESSERTS	1	2	0.6905	0.0557347	8.55626	1	0	NA	--	--
2026	FLUID MILK	2	5	0.2706	0.0469562	1.5605	0	0	NA	--	--
203	CANNED, FROZEN AND PRESERVED FRUITS AND VEGETABLES	8	7	1.4399	0.498892	4.15599	1	3	0.7952	0.0783425	8.07229
2032	CANNED SPECIALTIES	1	2	0.5276	0.045313	6.14488	0	1	NA	--	--
2033	CANNED FRUITS AND VEGETABLES	2	2	1.8599	0.237493	14.5662	0	2	NA	--	--
2037	FROZEN FRUITS AND VEGETABLES	3	2	1.6734	0.266254	10.5185	1	0	NA	--	--
2038	FROZEN SPECIALTIES, NEC	1	0	NA	--	--	0	0	NA	--	--
204	GRAIN MILL PRODUCTS	5	8	0.7414	0.22123	2.48482	0	0	NA	--	--
2041	FLOUR AND OTHER GRAIN MILL PRODUCTS	0	1	NA	--	--	0	0	NA	--	--
2043	CEREAL BREAKFAST FOODS	1	1	0.7016	0.0321659	15.305	0	0	NA	--	--
2046	WET CORN MILLING	4	1	4.3376	0.454871	41.3635	0	0	NA	--	--
2048	PREPARED FEEDS, NEC	0	4	NA	--	--	0	0	NA	--	--
205	BAKERY PRODUCTS	6	12	0.4485	0.154856	1.29906	0	1	NA	--	--
2051	BREAD, CAKE AND RELATED PRODUCTS	6	12	0.4485	0.154856	1.29906	0	1	NA	--	--
206	SUGAR AND CONFECTIONERY PRODUCTS	1	5	0.1639	0.0160667	1.67323	1	2	0.7093	0.0442479	11.3724
2061	RAW CANE SUGAR	0	1	NA	--	--	0	0	NA	--	--
2064	CANDY AND OTHER CONFECTIONERY PRODUCTS	0	4	NA	--	--	1	1	2.5943	0.071919	93.5833
2066	CHOCOLATE AND COCOA PRODUCTS	1	0	NA	--	--	0	1	NA	--	--
208	BEVERAGES	9	13	0.6997	0.285521	1.71489	1	0	NA	--	--
2082	MALT BEVERAGES	1	2	0.6408	0.055759	7.36634	0	0	NA	--	--
2084	WINES, BRANDY AND BRANDY SPIRITS	0	0	NA	--	--	1	0	NA	--	--
2085	DISTILLED AND BLENDED LIQUORS	0	1	NA	--	--	0	0	NA	--	--
2086	BOTTLED AND CANNED SOFT DRINKS	8	10	0.769	0.287379	2.05793	0	0	NA	--	--
209	MISCELLANEOUS FOOD PREPARATIONS AND KINDRED PRODUCTS	12	9	1.2034	0.486304	2.97839	2	4	0.3949	0.0617326	2.52742
2091	CANNED/CURED FISH AND SEAFOODS	3	2	1.8022	0.284829	11.4035	0	4	NA	--	--
2092	FRESH OR FROZEN PREPARED FISH	2	3	0.6751	0.106007	4.29965	1	1	0.7127	0.042232	12.0279
2095	ROASTED COFFEE	1	0	NA	--	--	0	0	NA	--	--
2096	POTATO CHIPS AND SIMILAR SNACKS	2	0	NA	--	--	0	0	NA	--	--
2097	MANUFACTURED ICE	2	3	0.3985	0.059566	2.66669	0	0	NA	--	--
2099	FOOD PREPARATIONS, NEC	2	0	NA	--	--	1	0	NA	--	--
21	TOBACCO MANUFACTURERS	1	2	0.4693	0.0398584	5.52648	0	0	NA	--	--
211	CIGARETTES	0	1	NA	--	--	0	0	NA	--	--
2111	CIGARETTES	0	1	NA	--	--	0	0	NA	--	--
212	CIGARS	0	1	NA	--	--	0	0	NA	--	--
2121	CIGARS	0	1	NA	--	--	0	0	NA	--	--
22	TEXTILE MILL PRODUCTS	51	57	0.9005	0.593834	1.36571	12	20	0.7085	0.319667	1.57038
221	BROADWOVEN FABRIC MILLS, COTTON	10	12	0.9497	0.385307	2.34091	3	2	2.0802	0.301118	14.3714
2211	BROADWOVEN FABRIC MILLS, COTTON	10	12	0.9497	0.385307	2.34091	3	2	2.0802	0.301118	14.3714
222	BROADWOVEN FABRIC MILLS, MANMADE FIBER AND SILK	2	5	0.4212	0.0768034	2.30994	1	2	0.4525	0.0377959	5.41973
2221	BROADWOVEN FABRIC MILLS, MANMADE	2	5	0.4212	0.0768034	2.30994	1	2	0.4525	0.0377959	5.41973
223	BROADWOVEN FABRC MILLS WOOL (INCLUDING DYEING/FINISHING)	20	23	0.6855	0.359475	1.3075	2	4	0.7429	0.126566	4.36156
2231	BROADWOVEN FABRIC MILLS, WOOL	20	23	0.6855	0.359475	1.3075	2	4	0.7429	0.126566	4.36156
224	NARROW FABRIC/SMALLWARES MILLS	0	1	NA	--	--	0	0	NA	--	--
2241	NARROW FABRIC MILLS	0	1	NA	--	--	0	0	NA	--	--
225	KNITTING MILLS	8	3	2.8419	0.720474	11.2103	4	7	0.8456	0.219174	3.26254
2252	HOSIERY, NEC	0	1	NA	--	--	0	0	NA	--	--
2253	KNIT OUTERWEAR MILLS	1	0	NA	--	--	0	2	NA	--	--
2254	KNIT UNDERWEAR MILLS	0	0	NA	--	--	1	0	NA	--	--
2258	LACE AND WARP KNIT FABRIC MILLS	0	0	NA	--	--	0	1	NA	--	--
2259	KNITTING MILLS, NEC	2	1	2.8875	0.248556	33.5452	2	1	4.6335	0.350773	61.2059
226	DYEING/FINISHING TEXTILES, EXCEPT WOOL FINISHING	2	2	1.9507	0.261423	14.5558	0	0	NA	--	--
2261	FINISHING PLANTS, COTTON	1	1	1.5242	0.094371	24.6195	0	0	NA	--	--
2262	FINISHING PLANTS, MANMADE	0	1	NA	--	--	0	0	NA	--	--
227	CARPETS AND RUGS	1	1	1.0457	0.0611476	17.8831	1	1	2.6213	0.143932	47.7393
2273	CARPETS AND RUGS	1	1	1.0457	0.0611476	17.8831	1	1	2.6213	0.143932	47.7393
228	YARN AND THREAD MILLS	4	1	5.534	0.543181	56.382	2	5	0.4313	0.0766576	2.42737
2281	YARN SPINNING MILLS	2	1	1.9727	0.172901	22.5078	1	1	1.2565	0.075266	20.9766
2284	THREAD MILLS	0	0	NA	--	--	1	2	0.4563	0.0339412	6.13524
229	MISCELLANEOUS TEXTILE GOODS	4	8	0.5505	0.153011	1.98096	0	0	NA	--	--
2295	COATED FABRICS, NOT RUBBERIZED	0	1	NA	--	--	0	0	NA	--	--
2297	NONWOVEN FABRICS	1	0	NA	--	--	0	0	NA	--	--
2298	CORDAGE AND TWINE	0	1	NA	--	--	0	0	NA	--	--
2299	TEXTILE GOODS, NEC	3	6	0.566	0.130086	2.46289	0	0	NA	--	--
23	APPAREL AND OTHER TEXTILE PRODUCTS	13	17	0.7381	0.341904	1.5936	15	18	0.5717	0.262487	1.24529
232	MENS AND BOYS FURNISHINGS/WORK CLOTHING	0	1	NA	--	--	0	1	NA	--	--
2321	MENS/BOYS SHIRTS	0	1	NA	--	--	0	0	NA	--	--
2322	MENS/BOYS UNDERWEAR AND NIGHTWEAR	0	0	NA	--	--	0	1	NA	--	--
233	WOMENS/MISSES/JUNIORS OUTERWEAR	0	2	NA	--	--	4	1	3.9157	0.360068	42.5844
2331	WOMENS/MISSES BLOUSES AND SHIRTS	0	0	NA	--	--	1	0	NA	--	--
2335	WOMENS/JUNIORS/MISSES DRESSES	0	0	NA	--	--	2	1	1.7816	0.138819	22.8659
2339	WOMENS/MISSES OUTERWEAR, NEC	0	0	NA	--	--	1	0	NA	--	--
234	WOMENS/MISSES/CHILDRENS/INFANTS UNDERWEAR & NIGHTWEAR	0	2	NA	--	--	2	2	0.9862	0.130318	7.46453
2341	WOMENS/CHILDRENS UNDERWEAR	0	1	NA	--	--	2	2	0.9862	0.130318	7.46453
2342	BRAS, GIRDLES, AND ALLIED GARMENTS	0	1	NA	--	--	0	0	NA	--	--
238	MISCELLANEOUS APPAREL AND ACCESSORIES	0	1	NA	--	--	0	2	NA	--	--
2381	FABRIC DRESS AND WORK GLOVES	0	0	NA	--	--	0	1	NA	--	--
2389	APPAREL AND ACCESSORIES, NEC	0	1	NA	--	--	0	1	NA	--	--
239	MISCELLANEOUS FABRICATED TEXTILE PRODUCTS	6	8	0.7352	0.239855	2.2537	4	3	0.875	0.178311	4.29471
2392	HOUSEFURNISHINGS, NEC	4	2	2.1104	0.364064	12.2339	0	1	NA	--	--
2393	TEXTILE BAGS	0	0	NA	--	--	1	0	NA	--	--
2394	CANVAS AND RELATED PRODUCTS	1	1	0.6975	0.0425298	11.4405	0	0	NA	--	--
2395	PLEATING AND STITCHING	0	0	NA	--	--	1	0	NA	--	--
2396	AUTOMOTIVE AND APPAREL TRIMMINGS	1	2	0.2926	0.0231396	3.70092	0	0	NA	--	--
2399	FABRICATED TEXTILE PRODUCTS, NEC	0	3	NA	--	--	1	2	0.328	0.0287702	3.7404
24	LUMBER AND WOOD PRODUCTS	91	103	1.0069	0.730285	1.38847	9	13	0.9434	0.364991	2.43879
241	LOGGING	37	48	1.0806	0.675223	1.72951	0	1	NA	--	--
2411	LOGGING	37	48	1.0806	0.675223	1.72951	0	1	NA	--	--
242	SAWMILLS AND PLANING MILLS	23	20	1.1494	0.599642	2.20338	1	1	1.3225	0.0552249	31.6739
2421	SAWMILLS AND PLANING MILLS, GENERAL	21	19	1.0649	0.541783	2.09348	1	0	NA	--	--
2426	HARDWOOD DIMENSION AND FLOORING MILLS	2	2	1.4118	0.192588	10.3504	0	0	NA	--	--
243	MILLWORK/VENEER/PLYWOOD/STRUCTURAL WOOD	15	15	1.0406	0.488148	2.2185	4	2	2.232	0.340786	14.6191
2431	MILLWORK	2	6	0.389	0.0740881	2.04322	1	2	0.5309	0.0382553	7.37033
2434	WOOD KITCHEN CABINETS	5	4	1.1873	0.304263	4.63371	2	0	NA	--	--
2435	HARDWOOD VENEER AND PLYWOOD	4	4	0.979	0.223052	4.29699	0	0	NA	--	--
2439	STRUCTURAL WOOD MEMBERS, NEC	0	0	NA	--	--	0	0	NA	--	--
244	WOOD CONTAINERS	1	3	0.2043	0.019653	2.12434	0	0	NA	--	--
2441	NAILED WOOD BOXES AND SHOOK	0	2	NA	--	--	0	0	NA	--	--
2448	WOOD PALLETS AND SKIDS	0	1	NA	--	--	0	0	NA	--	--
2449	WOOD CONTAINERS, NEC	1	0	NA	--	--	0	0	NA	--	--
245	WOOD BUILDINGS AND MOBILE HOMES	1	3	0.1626	0.0150649	1.75681	0	1	NA	--	--
2451	MOBILE HOMES	1	1	0.3422	0.0211077	5.55029	0	1	NA	--	--
2452	PREFABRICATED WOOD BUILDINGS	0	2	NA	--	--	0	0	NA	--	--
249	MISCELLANEOUS WOOD PRODUCTS	21	17	1.3455	0.674907	2.68273	5	9	0.7745	0.233662	2.56756
2491	WOOD PRESERVING	1	0	NA	--	--	0	0	NA	--	--
2499	WOOD PRODUCTS, NEC	20	17	1.2958	0.644937	2.60372	5	9	0.7745	0.233662	2.56756
25	FURNITURE AND FIXTURES	20	19	1.0154	0.514902	2.0027	4	3	2.7666	0.56044	13.6579
251	HOUSEHOLD FURNITURE	14	17	0.8325	0.390395	1.77555	3	3	1.8055	0.328128	9.93498
2511	WOOD HOUSEHOLD FURNITURE	2	5	0.4524	0.0833692	2.45589	2	0	NA	--	--
2512	UPHOLSTERED HOUSEHOLD FURNITURE	1	1	1.2461	0.0409231	37.9495	0	0	NA	--	--
2514	METAL HOUSEHOLD FURNITURE	1	1	1.206	0.0690192	21.0747	0	0	NA	--	--
2515	MATTRESSES AND BEDSPRINGS	2	0	NA	--	--	0	0	NA	--	--
2517	WOOD TV AND RADIO CABINETS	0	1	NA	--	--	0	0	NA	--	--
252	OFFICE FURNITURE	1	0	NA	--	--	0	0	NA	--	--
254	PARTITIONS/SHELVING/LOCKERS/OFFICE AND STORE FIXTURES	4	2	1.8731	0.290424	12.0817	1	0	NA	--	--
2541	WOOD PARTITIONS AND FIXTURES	1	0	NA	--	--	1	0	NA	--	--
2542	PARTITIONS AND FIXTURES, EXCEPT WOOD	3	0	NA	--	--	0	0	NA	--	--
259	MISCELLANEOUS FURNITURE AND FIXTURES	1	0	NA	--	--	0	0	NA	--	--
2591	DRAPERY HARDWARE, BLINDS AND SHADES	1	0	NA	--	--	0	0	NA	--	--
26	PAPER AND ALLIED PRODUCTS	81	96	0.9812	0.70226	1.37101	8	8	1.5429	0.544098	4.37542
261	PULP MILLS	3	6	0.8191	0.194243	3.45475	1	0	NA	--	--
2611	PULP MILLS	3	6	0.8191	0.194243	3.45475	1	0	NA	--	--
262	PAPER MILLS	51	66	0.9239	0.615408	1.38713	5	5	2.0324	0.551126	7.49494
2621	PAPER MILLS	51	66	0.9239	0.615408	1.38713	5	5	2.0324	0.551126	7.49494
263	PAPERBOARD MILLS	2	1	3.6164	0.284125	46.0305	0	0	NA	--	--
2631	PAPERBOARD MILLS	2	1	3.6164	0.284125	46.0305	0	0	NA	--	--
265	PAPERBOARD CONTAINERS AND BOXES	6	8	0.9182	0.29663	2.84278	1	1	0.6231	0.0374861	10.3598
2652	SETUP PAPERBOARD BOXES	0	1	NA	--	--	0	0	NA	--	--
2653	CORRUGATED AND SOLID FIBER BOXES	3	3	1.4435	0.26684	7.80911	0	0	NA	--	--
2655	FIBER CANS, DRUMS AND SIMILAR PRODUCTS	1	0	NA	--	--	0	0	NA	--	--
2656	SANITARY FOOD CONTAINERS	1	1	1.9674	0.122089	31.7047	1	1	0.6231	0.0374861	10.3598
2657	FOLDING PAPERBOARD BOXES	1	1	0.652	0.0321429	13.2271	0	0	NA	--	--
267	CONVERTED PAPER/PAPERBOARD PRODUCTS, EXCEPT CONTAINERS	19	16	1.1928	0.577282	2.46486	1	2	0.5643	0.0477186	6.67488
2671	PAPER COATED AND LAMINATED PACKAGING	3	1	3.9964	0.285736	55.8956	0	0	NA	--	--
2672	PAPER COATED AND LAMINATED, NEC	1	3	0.2762	0.0240238	3.17691	0	0	NA	--	--
2673	BAGS	1	0	NA	--	--	0	0	NA	--	--
2674	BAGS	0	1	NA	--	--	0	1	NA	--	--
2675	DIE-CUT PAPER AND BOARD	1	0	NA	--	--	0	0	NA	--	--
2676	SANITARY PAPER PRODUCTS	3	3	0.8394	0.156316	4.50779	0	0	NA	--	--
2677	ENVELOPES	1	0	NA	--	--	0	1	NA	--	--
2678	STATIONERY PRODUCTS	1	1	0.6229	0.0384333	10.0984	0	0	NA	--	--
2679	CONVERTED PAPER PRODUCTS, NEC	4	5	0.9788	0.233511	4.10337	1	0	NA	--	--
27	PRINTING AND PUBLISHING	45	53	0.9522	0.616776	1.47011	14	18	0.8761	0.389485	1.97084
271	NEWSPAPERS	16	20	0.9965	0.495305	2.0052	6	7	0.724	0.209162	2.50619
2711	NEWSPAPERS	16	20	0.9965	0.495305	2.0052	6	7	0.724	0.209162	2.50619
272	PERIODICALS	4	5	0.8357	0.202137	3.45519	3	5	0.7929	0.151523	4.14924
2721	PERIODICALS	4	5	0.8357	0.202137	3.45519	3	5	0.7929	0.151523	4.14924
273	BOOKS	10	9	1.2969	0.488139	3.44593	1	5	0.6632	0.0695504	6.32566
2731	BOOK PUBLISHING	4	6	0.7868	0.205579	3.01154	0	4	NA	--	--
2732	BOOK PRINTING	6	3	2.3851	0.528211	10.7703	1	1	1.6684	0.101612	27.3946
274	MISCELLANEOUS PUBLISHING	2	2	0.968	0.128929	7.26913	0	1	NA	--	--
2741	MISCELLANEOUS PUBLISHING	2	2	0.968	0.128929	7.26913	0	1	NA	--	--
275	COMMERCIAL PRINTING	11	17	0.7088	0.319063	1.57496	3	2	1.5134	0.212047	10.8025
2752	COMMERCIAL PRINTING, LITHOGRAPHIC	2	1	1.8778	0.163695	21.5431	1	1	1.6227	0.0833114	31.6067
2759	COMMERCIAL PRINTING, NEC	1	1	0.7629	0.0368889	15.7799	0	1	NA	--	--
276	MANIFOLD BUSINESS FORMS	3	2	1.1726	0.177345	7.75338	0	0	NA	--	--
2761	MANIFOLD BUSINESS FORMS	3	2	1.1726	0.177345	7.75338	0	0	NA	--	--
277	GREETING CARDS	2	1	2.5832	0.218619	30.5242	1	1	0.9054	0.0509153	16.1015
2771	GREETING CARDS	2	1	2.5832	0.218619	30.5242	1	1	0.9054	0.0509153	16.1015
278	BLANKBOOKS, LOOSELEAF BINDERS AND BOOKBIND	3	0	NA	--	--	0	0	NA	--	--
2789	BOOKBINDING AND RELATED WORK	3	0	NA	--	--	0	0	NA	--	--
279	SERVICE INDUSTRIES FOR THE PRINTING TRADE	0	0	NA	--	--	0	1	NA	--	--
2791	TYPESETTING	0	0	NA	--	--	0	1	NA	--	--
2796	PLATEMAKING SERVICES	0	0	NA	--	--	0	0	NA	--	--
28	CHEMICALS AND ALLIED PRODUCTS	34	31	1.1742	0.689596	1.99949	4	6	0.8545	0.221028	3.30377
281	INDUSTRIAL INORGANIC CHEMICALS	1	10	0.1526	0.0187308	1.2444	0	1	NA	--	--
2813	INDUSTRIAL GASES	0	1	NA	--	--	0	0	NA	--	--
2819	INDUSTRIAL INORGANIC CHEMICALS, NEC	1	2	1.1704	0.0999929	13.6998	0	0	NA	--	--
282	PLASTICS MATERIALS/SYNTHETIC RESINS/RUBBER/CELLULOSIC AND OTHER MANMADE FIBERS	4	3	2.3836	0.46442	12.2341	0	0	NA	--	--
2821	PLASTICS MATERIALS AND RESINS	2	2	1.7685	0.203536	15.3679	0	0	NA	--	--
2822	SYNTHETIC RUBBER	0	1	NA	--	--	0	0	NA	--	--
283	DRUGS	6	5	1.0501	0.288615	3.82102	0	3	NA	--	--
2833	MEDICINALS AND BOTANICALS	0	0	NA	--	--	0	1	NA	--	--
2834	PHARMACEUTICAL PREPARATIONS	5	5	0.8873	0.228998	3.43814	0	2	NA	--	--
2835	DIAGNOSTIC SUBSTANCES	1	0	NA	--	--	0	0	NA	--	--
284	SOAP/DETERGENTS/CLEANNG PREPARATIONS/PERFUMES/COSMETICS	8	6	1.2797	0.404927	4.04483	3	0	NA	--	--
2841	SOAP AND OTHER DETERGENTS	2	2	0.8391	0.105386	6.68174	1	0	NA	--	--
2842	POLISHES AND SANITATION GOODS	1	1	0.7026	0.0301387	16.3805	1	0	NA	--	--
2844	TOILET PREPARATIONS	3	3	0.9678	0.175762	5.32919	2	0	NA	--	--
285	PAINTS/VARNISHES/LACQUERS/ENAMELS/ALLIED PRODUCTS	5	2	2.226	0.401793	12.3327	2	0	NA	--	--
2851	PAINTS AND ALLIED PRODUCTS	5	2	2.226	0.401793	12.3327	2	0	NA	--	--
286	INDUSTRIAL ORGANIC CHEMICALS	2	1	1.6086	0.13542	19.1083	0	0	NA	--	--
2865	CYCLIC CRUDES AND INTERMEDIATES	2	0	NA	--	--	0	0	NA	--	--
2869	INDUSTRIAL ORGANIC CHEMICALS, NEC	0	1	NA	--	--	0	0	NA	--	--
287	AGRICULTURAL CHEMICALS	1	1	1.2472	0.0693963	22.4174	0	0	NA	--	--
289	MISCELLANEOUS CHEMICAL PRODUCTS	7	4	1.7799	0.491483	6.44624	1	0	NA	--	--
2891	ADHESIVES AND SEALANTS	3	2	1.752	0.278225	11.0332	0	0	NA	--	--
2892	EXPLOSIVES	1	0	NA	--	--	1	0	NA	--	--
2893	PRINTING INK	1	0	NA	--	--	0	0	NA	--	--
2899	CHEMICAL PREPARATIONS, NEC	3	2	1.6224	0.238678	11.0282	0	0	NA	--	--
29	PETROLEUM AND COAL PRODUCTS	6	6	1.3588	0.407486	4.5314	2	2	1.6035	0.2162	11.8935
291	PETROLEUM REFINING	2	2	1.6127	0.206941	12.5681	1	2	0.8066	0.0697566	9.32848
2911	PETROLEUM REFINING	2	2	1.6127	0.206941	12.5681	1	2	0.8066	0.0697566	9.32848
295	ASPHALT PAVING AND ROOFING MATERIALS	4	4	1.2404	0.282868	5.4401	1	0	NA	--	--
2951	ASPHALT PAVING MIXTURES AND BLOCKS	0	1	NA	--	--	1	0	NA	--	--
2952	ASPHALT FELTS AND COATINGS	4	2	2.9368	0.477488	18.0641	0	0	NA	--	--
299	MISCELLANEOUS PRODUCTS OF PETROLEUM AND COAL	0	1	NA	--	--	0	0	NA	--	--
2992	LUBRICATING OILS AND GREASES	0	1	NA	--	--	0	0	NA	--	--
30	RUBBER AND MISCELLANEOUS PLASTICS PRODUCTS	36	35	0.9719	0.58303	1.62029	7	7	1.0687	0.339043	3.3688
301	TIRES AND INNER TUBES	3	3	0.8837	0.162742	4.79918	0	0	NA	--	--
3011	TIRES AND INNER TUBES	3	3	0.8837	0.162742	4.79918	0	0	NA	--	--
302	RUBBER AND PLASTICS FOOTWEAR	2	5	0.3624	0.0591995	2.21875	1	2	0.5211	0.0420342	6.46205
3021	RUBBER AND PLASTICS FOOTWEAR	2	5	0.3624	0.0591995	2.21875	1	2	0.5211	0.0420342	6.46205
305	GASKETS, PACKING & SEALING DEVICES, RUBBER	1	2	0.5324	0.0448389	6.32232	1	0	NA	--	--
3053	GASKETS, PACKING AND SEALING DEVICES	1	2	0.5324	0.0448389	6.32232	1	0	NA	--	--
306	FABRICATED RUBBER PRODUCTS, NEC	10	6	1.4574	0.489405	4.34026	3	1	3.2129	0.253963	40.6469
3061	MECHANICAL RUBBER GOODS	3	2	1.756	0.259239	11.8946	1	0	NA	--	--
3069	FABRICATED RUBBER PRODUCTS, NEC	7	4	1.3273	0.355245	4.9599	2	1	2.0669	0.121631	35.1258
308	MISCELLANEOUS PLASTICS PRODUCTS	18	19	0.8805	0.434178	1.78574	2	4	0.7644	0.135682	4.30705
3081	UNSUPPORTED PLASTICS FILM AND SHEET	0	2	NA	--	--	0	0	NA	--	--
3083	LAMINATED PLASTICS PLATE AND SHEET	0	1	NA	--	--	0	0	NA	--	--
3084	PLASTICS PIPE	1	0	NA	--	--	0	0	NA	--	--
3086	PLASTICS FOAM PRODUCTS	0	1	NA	--	--	0	0	NA	--	--
3089	PLASTICS PRODUCTS, NEC	14	14	0.945	0.422516	2.11373	1	4	0.3935	0.0427305	3.62479
31	LEATHER AND LEATHER PRODUCTS	62	76	0.8066	0.55361	1.17549	30	31	1.3049	0.727746	2.34004
311	LEATHER TANNING AND FINISHING	17	19	0.8807	0.440155	1.76248	1	2	0.6952	0.0547868	8.82263
3111	LEATHER TANNING AND FINISHING	17	19	0.8807	0.440155	1.76248	1	2	0.6952	0.0547868	8.82263
313	BOOT AND SHOE CUT STOCK AND FINDINGS	1	3	0.2664	0.0243055	2.92	1	2	0.3745	0.0320369	4.37809
3131	FOOTWEAR CUT STOCK	1	3	0.2664	0.0243055	2.92	1	2	0.3745	0.0320369	4.37809
314	FOOTWEAR, EXCEPT RUBBER	43	58	0.733	0.471242	1.1402	29	29	1.3493	0.742141	2.45331
3142	HOUSE SLIPPERS	0	1	NA	--	--	1	1	1.3084	0.0662447	25.8425
3143	MENS FOOTWEAR, EXCEPT ATHLETIC	2	2	0.6381	0.0838532	4.85608	3	0	NA	--	--
3144	WOMENS FOOTWEAR, EXCEPT ATHLETIC	5	4	0.8271	0.204429	3.34695	3	1	3.1078	0.303675	31.8053
3149	FOOTWEAR, EXCEPT RUBBER, NEC	5	3	1.9623	0.413353	9.31594	1	4	0.3391	0.0344632	3.33812
316	LUGGAGE	2	0	NA	--	--	0	0	NA	--	--
3161	LUGGAGE	2	0	NA	--	--	0	0	NA	--	--
32	STONE, CLAY, GLASS, AND CONCRETE PRODUCTS	30	29	0.9077	0.520357	1.58345	3	2	1.1602	0.172148	7.82
321	FLAT GLASS	2	1	1.0445	0.0917084	11.8965	0	0	NA	--	--
3211	FLAT GLASS	2	1	1.0445	0.0917084	11.8965	0	0	NA	--	--
322	GLASS AND GLASSWARE, PRESSED OR BLOWN	2	3	0.9928	0.159869	6.16657	0	0	NA	--	--
3221	GLASS CONTAINERS	1	0	NA	--	--	0	0	NA	--	--
3229	PRESSED AND BLOWN GLASS, NEC	0	2	NA	--	--	0	0	NA	--	--
323	GLASS PRODUCTS, MADE OF PURCHASED GLASS	0	3	NA	--	--	1	0	NA	--	--
3231	PRODUCTS OF PURCHASED GLASS	0	3	NA	--	--	1	0	NA	--	--
324	CEMENT, HYDRAULIC	1	2	0.4409	0.0293279	6.63094	0	0	NA	--	--
3241	CEMENT, HYDRAULIC	1	2	0.4409	0.0293279	6.63094	0	0	NA	--	--
325	STRUCTURAL CLAY PRODUCTS	4	1	4.365	0.441791	43.1288	0	0	NA	--	--
3253	CERAMIC WALL AND FLOOR TILE	1	0	NA	--	--	0	0	NA	--	--
3255	CLAY REFRACTORIES	1	1	0.6939	0.035523	13.5583	0	0	NA	--	--
3259	STRUCTURAL CLAY PRODUCTS, NEC	1	0	NA	--	--	0	0	NA	--	--
326	POTTERY AND RELATED PRODUCTS	2	1	1.4192	0.125323	16.0718	2	1	1.4258	0.110129	18.4601
3264	PORCELAIN ELECTRICAL SUPPLIES	0	1	NA	--	--	0	0	NA	--	--
3269	POTTERY PRODUCTS, NEC	2	0	NA	--	--	2	1	1.4258	0.110129	18.4601
327	CONCRETE, GYPSUM AND PLASTER PRODUCTS	14	9	1.3585	0.551835	3.34474	0	0	NA	--	--
3271	CONCRETE BLOCK AND BRICK	1	2	0.4435	0.0335738	5.86075	0	0	NA	--	--
3272	CONCRETE PRODUCTS, NEC	7	4	1.6169	0.435971	5.99709	0	0	NA	--	--
3273	READY-MIXED CONCRETE	2	1	1.4518	0.12983	16.2367	0	0	NA	--	--
3275	GYPSUM PRODUCTS	2	2	0.6709	0.0743893	6.05073	0	0	NA	--	--
328	CUT STONE AND STONE PRODUCTS	2	2	0.7624	0.0949812	6.12001	0	1	NA	--	--
3281	CUT STONE AND STONE PRODUCTS	2	2	0.7624	0.0949812	6.12001	0	1	NA	--	--
329	ABRASIVE, ASBESTOS, MISC NONMETALLIC MINERAL PRODUCTS	2	7	0.2077	0.0387643	1.11315	0	0	NA	--	--
3291	ABRASIVE PRODUCTS	0	2	NA	--	--	0	0	NA	--	--
3292	ASBESTOS PRODUCTS	1	0	NA	--	--	0	0	NA	--	--
3295	MINERALS, GROUND OR TREATED	0	1	NA	--	--	0	0	NA	--	--
3296	MINERAL WOOL	0	4	NA	--	--	0	0	NA	--	--
3299	NONMETALLIC MINERAL PRODUCTS, NEC	1	0	NA	--	--	0	0	NA	--	--
33	PRIMARY METAL INDUSTRIES	25	31	0.7753	0.438326	1.37152	1	3	0.7196	0.0615271	8.4177
331	STEEL WORKS, BLAST FURNACES, ROLLNG/FINISHING MILLS	12	16	0.7416	0.336592	1.63428	0	0	NA	--	--
3312	BLAST FURNACES AND STEEL MILLS	5	4	1.2303	0.315776	4.79351	0	0	NA	--	--
3315	STEEL WIRE AND RELATED PRODUCTS	5	7	0.6068	0.178873	2.0588	0	0	NA	--	--
3316	COLD FINISHING OF STEEL SHAPES	1	0	NA	--	--	0	0	NA	--	--
3317	STEEL PIPE AND TUBES	0	2	NA	--	--	0	0	NA	--	--
332	IRON AND STEEL FOUNDRIES	1	5	0.1856	0.0206654	1.66789	0	1	NA	--	--
3321	GRAY AND DUCTILE IRON FOUNDRIES	0	1	NA	--	--	0	0	NA	--	--
3324	STEEL INVESTMENT FOUNDRIES	0	0	NA	--	--	0	1	NA	--	--
3325	STEEL FOUNDRIES, NEC	0	2	NA	--	--	0	0	NA	--	--
333	PRIMARY SMELTING/REFINING OF NONFERROUS METALS	1	1	4.4832	0.274085	73.3343	0	0	NA	--	--
3339	PRIMARY NONFERROUS METALS, NEC	1	1	4.4832	0.274085	73.3343	0	0	NA	--	--
334	SECONDARY SMELTING/REFINING OF NONFERROUS METALS	1	1	0.6748	0.041617	10.9435	0	1	NA	--	--
3341	SECONDARY NONFERROUS METALS	1	1	0.6748	0.041617	10.9435	0	1	NA	--	--
335	ROLLING/DRAWING/EXTRUDING OF NONFERROUS METALS	4	6	0.4611	0.11507	1.84842	1	1	1.2285	0.0681491	22.1488
3351	COPPER ROLLING AND DRAWING	1	0	NA	--	--	0	0	NA	--	--
3356	NONFERROUS ROLLING AND DRAWING, NEC	0	1	NA	--	--	0	0	NA	--	--
3357	NONFERROUS WIREDRAWING AND INSULATING	3	5	0.351	0.074888	1.64572	1	1	1.2285	0.0681491	22.1488
336	NONFERROUS FOUNDRIES (CASTINGS)	2	1	3.4236	0.305658	38.3483	0	0	NA	--	--
3369	NONFERROUS FOUNDRIES, NEC	0	1	NA	--	--	0	0	NA	--	--
34	FABRICATED METAL PRODUCTS	61	64	0.917	0.623577	1.3486	8	11	0.8003	0.303505	2.11053
341	METAL CANS AND SHIPPING CONTAINERS	1	4	0.2422	0.025917	2.26501	0	0	NA	--	--
3411	METAL CANS	1	4	0.2422	0.025917	2.26501	0	0	NA	--	--
342	CUTLERY, HANDTOOLS AND GENERAL HARDWARE	6	6	0.8457	0.246014	2.90785	2	2	0.8991	0.112847	7.16505
3421	CUTLERY	1	0	NA	--	--	1	0	NA	--	--
3423	HAND AND EDGE TOOLS, NEC	1	2	0.4798	0.0351143	6.55789	0	1	NA	--	--
3429	HARDWARE, NEC	3	3	0.9809	0.167677	5.73857	0	1	NA	--	--
343	HEATING EQUIPMENT, EXCEPT ELECTRIC & WARM AIR FURNCES	3	5	0.4058	0.0921401	1.78773	0	2	NA	--	--
3431	METAL SANITARY WARE	0	0	NA	--	--	0	1	NA	--	--
3432	PLUMBING FIXTURE FITTINGS AND TRIM	0	1	NA	--	--	0	0	NA	--	--
3433	HEATING EQUIPMENT, EXCEPT ELECTRIC	3	4	0.5885	0.126768	2.73235	0	1	NA	--	--
344	FABRICATED STRUCTURAL METAL PRODUCTS	15	11	1.6649	0.723667	3.83046	0	1	NA	--	--
3441	FABRICATED STRUCTURAL METAL	2	2	1.5287	0.203709	11.472	0	0	NA	--	--
3442	METAL DOORS, SASH AND TRIM	2	2	1.349	0.180373	10.0902	0	0	NA	--	--
3443	FABRICATED PLATE WORK (BOILER SHOPS)	7	4	1.6513	0.436804	6.24304	0	0	NA	--	--
3444	SHEET METALWORK	4	2	3.1196	0.521315	18.6691	0	1	NA	--	--
3446	ARCHITECTURAL METAL WORK	1	0	NA	--	--	0	0	NA	--	--
345	SCREW MACHINE PRODUCTS, BOLTS/NUTS/SCREWS/RIVETS	2	2	0.8493	0.106406	6.77948	0	0	NA	--	--
3452	BOLTS, NUTS, RIVETS, AND WASHERS	2	2	0.8493	0.106406	6.77948	0	0	NA	--	--
346	METAL FORGINGS AND STAMPINGS	3	8	0.38	0.0927319	1.5579	0	1	NA	--	--
3462	IRON AND STEEL FORGINGS	1	3	0.7287	0.0688611	7.71146	0	1	NA	--	--
3463	NONFERROUS FORGINGS	1	1	0.4247	0.0243131	7.42164	0	0	NA	--	--
3465	AUTOMOTIVE STAMPINGS	1	1	0.9468	0.054379	16.4869	0	0	NA	--	--
3469	METAL STAMPINGS, NEC	1	3	0.2149	0.0199765	2.313	0	0	NA	--	--
347	COATING, ENGRAVING AND ALLIED SERVICES	4	5	0.5199	0.131168	2.06126	1	1	1.9493	0.116458	32.63
3471	PLATING AND POLISHING	3	2	0.935	0.140672	6.21479	1	0	NA	--	--
3479	METAL COATING AND ALLIED SERVICES	1	2	0.4002	0.0343972	4.6565	0	1	NA	--	--
348	ORDNANCE AND ACCESSORIES, EXCEPT VEHICICLES AND GUIDED MISSILES	10	16	0.6609	0.286087	1.52699	4	1	5.0882	0.544762	47.5252
3483	AMMUNITION, EXCEPT FOR SMALL ARMS, NEC	1	3	0.2122	0.0192456	2.34081	0	0	NA	--	--
3484	SMALL ARMS	1	3	0.3554	0.0334208	3.78099	1	0	NA	--	--
3489	ORDNANCE AND ACCESSORIES, NEC	4	3	2.1639	0.448283	10.4457	1	1	1.1439	0.0621755	21.0479
349	MISCELLANEOUS FABRICATED METAL PRODUCTS	20	9	1.8806	0.818944	4.319	0	3	NA	--	--
3491	INDUSTRIAL VALVES	1	1	0.6427	0.0300241	13.7595	0	0	NA	--	--
3492	FLUID POWER VALVES AND HOSE FITTINGS	5	0	NA	--	--	0	1	NA	--	--
3494	VALVES AND PIPE FITTINGS, NEC	1	1	0.755	0.0341007	16.7199	0	0	NA	--	--
3495	WIRE SPRINGS	0	1	NA	--	--	0	0	NA	--	--
3496	MISC FABRICATED WIRE PRODUCTS	3	2	1.3441	0.197998	9.12492	0	1	NA	--	--
3498	FABRICATED PIPE AND FITTINGS	3	0	NA	--	--	0	0	NA	--	--
3499	FABRICATED METAL PRODUCTS, NEC	3	3	1.0792	0.207943	5.60185	0	1	NA	--	--
35	INDUSTRIAL MACHINERY AND EQUIPMENT	96	107	0.8688	0.633786	1.19112	9	13	0.7768	0.301672	2.00028
351	ENGINES AND TURBINES	9	4	2.0396	0.568452	7.31863	0	0	NA	--	--
3511	TURBINES AND TURBINE GENERATOR SETS	6	2	2.662	0.479466	14.7802	0	0	NA	--	--
3519	INTERNAL COMBUSTION ENGINES, NEC	2	2	1.1025	0.1342	9.05775	0	0	NA	--	--
352	FARM AND GARDEN MACHINERY AND EQUIPMENT	2	0	NA	--	--	0	0	NA	--	--
3523	FARM MACHINERY AND EQUIPMENT	2	0	NA	--	--	0	0	NA	--	--
353	CONSTRUCTION, MINNG & MATERIALS HANDLING MACHINERY	7	9	0.6198	0.219667	1.7488	1	0	NA	--	--
3531	CONSTRUCTION MACHINERY	3	2	1.153	0.177442	7.49268	0	0	NA	--	--
3532	MINING MACHINERY	2	2	0.6316	0.0803388	4.96688	1	0	NA	--	--
3533	OIL AND GAS FIELD MACHINERY	1	2	0.628	0.0515969	7.64428	0	0	NA	--	--
3534	ELEVATORS AND MOVING STAIRWAYS	0	1	NA	--	--	0	0	NA	--	--
3537	INDUSTRIAL TRUCKS AND TRACTORS	1	0	NA	--	--	0	0	NA	--	--
354	METALWORKING MACHINERY AND EQUIPMENT	19	19	0.7699	0.38601	1.53595	2	4	0.4843	0.0786824	2.98209
3541	MACHINE TOOLS, METAL CUTTING TYPES	6	7	0.6542	0.20605	2.07759	1	1	1.0003	0.0543658	18.4055
3542	MACHINE TOOLS, METAL FORMING TYPES	2	0	NA	--	--	0	0	NA	--	--
3544	SPECIAL DIES, TOOLS, JIGS, AND FIXTURES	6	4	1.1701	0.276674	4.9492	1	2	0.3861	0.0304252	4.90141
3545	MACHINE TOOL ACCESSORIES	2	3	0.8057	0.124711	5.20647	0	0	NA	--	--
3546	POWER-DRIVEN HANDTOOLS	1	0	NA	--	--	0	0	NA	--	--
3547	ROLLING MILL MACHINERY	1	0	NA	--	--	0	0	NA	--	--
3549	METALWORKING MACHINERY, NEC	0	1	NA	--	--	0	0	NA	--	--
355	SPECIAL INDUSTRY MACHINERY, EXCEPT METALWORKING	18	20	1.0975	0.551409	2.18479	1	2	0.4023	0.0348847	4.64071
3552	TEXTILE MACHINERY	7	4	2.3914	0.652311	8.76702	1	1	0.6832	0.0411424	11.3473
3553	WOODWORKING MACHINERY	1	0	NA	--	--	0	0	NA	--	--
3554	PAPER INDUSTRIES MACHINERY	2	5	0.4819	0.0772331	3.00789	0	0	NA	--	--
3555	PRINTING TRADES MACHINERY	3	7	0.4926	0.115037	2.10941	0	0	NA	--	--
3556	FOOD PRODUCTS MACHINERY	0	1	NA	--	--	0	1	NA	--	--
3559	SPECIAL INDUSTRY MACHINERY, NEC	6	5	1.084	0.315566	3.72384	0	0	NA	--	--
356	GENERAL INDUSTRIAL MACHINERY AND EQUIPMENT	12	17	0.7716	0.349567	1.70327	1	2	0.7063	0.0515344	9.68273
3561	PUMPS AND PUMPING EQUIPMENT	1	3	0.3082	0.0270543	3.51126	0	0	NA	--	--
3562	BALL AND ROLLER BEARINGS	4	7	0.7797	0.212648	2.85942	1	1	0.898	0.0511688	15.7607
3563	AIR AND GAS COMPRESSORS	0	1	NA	--	--	0	0	NA	--	--
3565	PACKAGING MACHINERY	3	4	0.7709	0.16422	3.61969	0	0	NA	--	--
3567	INDUSTRIAL FURNACES AND OVENS	0	1	NA	--	--	0	0	NA	--	--
3569	GENERAL INDUSTRIAL MACHINERY, NEC	4	1	4.0491	0.429554	38.1692	0	1	NA	--	--
357	COMPUTER AND OFFICE EQUIPMENT	31	32	1.1803	0.689014	2.0219	4	4	1.4554	0.338394	6.26036
3571	ELECTRONIC COMPUTERS	22	20	1.2633	0.65896	2.42221	2	4	0.7759	0.136007	4.42712
3572	COMPUTER STORAGE DEVICES	1	3	0.1963	0.0184333	2.0911	0	0	NA	--	--
3575	COMPUTER TERMINALS	0	1	NA	--	--	0	0	NA	--	--
3577	COMPUTER PERIPHERAL EQUIPMENT, NEC	3	7	0.9182	0.222562	3.78876	1	0	NA	--	--
3578	CALCULATING AND ACCOUNTING EQUIPMENT	2	0	NA	--	--	0	0	NA	--	--
3579	OFFICE MACHINES, NEC	1	1	0.9719	0.0547019	17.2714	1	1	2.3803	0.145525	38.9355
358	REFRIGERATION AND SERVICE INDUSTRY MACHINERY	6	8	0.4907	0.154068	1.56332	0	1	NA	--	--
3582	COMMERCIAL LAUNDRY EQUIPMENT	1	0	NA	--	--	0	0	NA	--	--
3585	REFRIGERATION AND HEATING EQUIPMENT	3	4	0.5255	0.100394	2.75149	0	0	NA	--	--
3589	SERVICE INDUSTRY MACHINERY, NEC	2	4	0.3473	0.0573145	2.10465	0	0	NA	--	--
359	MISC INDUSTRIAL COMMERCIAL MACHINERY EQUIPMENT	7	9	0.7385	0.25636	2.12776	0	0	NA	--	--
3592	CARBURETORS, PISTONS, RINGS, AND VALVES	0	1	NA	--	--	0	0	NA	--	--
3596	SCALES AND BALANCES, EXCEPT LABORATORY	1	4	0.2521	0.0252542	2.5174	0	0	NA	--	--
3599	INDUSTRIAL MACHINERY, NEC	5	4	1.1115	0.278004	4.44417	0	0	NA	--	--
36	ELECTRICAL AND ELECTRONIC EQUIPMENT	81	82	1.0048	0.709738	1.42278	38	34	1.2983	0.747229	2.25601
361	ELECTRIC TRANSMISSN DISTRIBUTION EQUIPMENT	4	12	0.3301	0.102617	1.06225	3	0	NA	--	--
3612	TRANSFORMERS, EXCEPT ELECTRONIC	2	5	0.3997	0.0722014	2.21344	0	0	NA	--	--
3613	SWITCHGEAR AND SWITCHBOARD APPARATUS	2	6	0.3419	0.0661286	1.76777	3	0	NA	--	--
362	ELECTRICAL INDUSTRIAL APPARATUS	6	4	1.2329	0.320466	4.74352	1	2	0.7095	0.0520222	9.6788
3621	MOTORS AND GENERATORS	3	3	0.5619	0.0989471	3.19184	1	0	NA	--	--
3624	CARBON AND GRAPHITE PRODUCTS	2	0	NA	--	--	0	0	NA	--	--
3625	RELAYS AND INDUSTRIAL CONTROLS	0	1	NA	--	--	0	0	NA	--	--
3629	ELECTRICAL INDUSTRIAL APPARATUS, NEC	0	0	NA	--	--	0	2	NA	--	--
363	HOUSEHOLD APPLIANCES	3	7	0.4813	0.110989	2.0879	2	1	2.1811	0.186049	25.5701
3631	HOUSEHOLD COOKING EQUIPMENT	1	1	0.8927	0.0537095	14.838	1	0	NA	--	--
3632	HOUSEHOLD REFRIGERATORS AND FREEZERS	0	1	NA	--	--	0	0	NA	--	--
3634	ELECTRIC HOUSEWARES AND FANS	0	2	NA	--	--	0	0	NA	--	--
3635	HOUSEHOLD VACUUM CLEANERS	1	0	NA	--	--	0	0	NA	--	--
3639	HOUSEHOLD APPLIANCES, NEC	0	1	NA	--	--	1	1	1.2137	0.0697901	21.1081
364	ELECTRIC LIGHTING AND WIRING EQUIPMENT	9	8	0.9518	0.348369	2.60063	2	5	0.5623	0.0885239	3.57191
3641	ELECTRIC LAMPS	4	2	1.4181	0.239628	8.39249	1	2	0.7548	0.0535766	10.6348
3643	CURRENT-CARRYING WIRING DEVICES	2	2	0.9359	0.117567	7.45081	0	1	NA	--	--
3644	NONCURRENT-CARRYING WIRING DEVICES	0	2	NA	--	--	0	1	NA	--	--
3645	RESIDENTIAL LIGHTING FIXTURES	0	0	NA	--	--	1	1	0.7275	0.032919	16.0783
3647	VEHICULAR LIGHTING EQUIPMENT	1	0	NA	--	--	0	0	NA	--	--
3648	LIGHTING EQUIPMENT, NEC	0	1	NA	--	--	0	0	NA	--	--
365	HOUSEHOLD AUDIOVIDEO EQUIPMENT, AUDIO RECORDING	5	4	1.2759	0.313416	5.19476	0	2	NA	--	--
3651	HOUSEHOLD AUDIO AND VIDEO EQUIPMENT	5	4	1.2759	0.313416	5.19476	0	2	NA	--	--
366	COMMUNICATIONS EQUIPMENT	15	21	0.8232	0.402364	1.68424	5	7	0.6263	0.171952	2.28122
3661	TELEPHONE AND TELEGRAPH APPARATUS	1	4	0.5239	0.0558998	4.91182	0	4	NA	--	--
3663	RADIO AND TV COMMUNICATIONS EQUIPMENT	5	5	1.2022	0.311842	4.63542	1	1	2.5133	0.151849	41.5992
3669	COMMUNICATIONS EQUIPMENT, NEC	3	6	0.4644	0.108561	1.98722	3	1	1.9382	0.194059	19.3587
367	ELECTRONIC COMPONENTS AND ACCESSORIES	38	31	1.3511	0.796905	2.29088	25	15	2.214	1.05297	4.6554
3671	ELECTRON TUBES	0	2	NA	--	--	0	0	NA	--	--
3672	PRINTED CIRCUIT BOARDS	10	7	1.6892	0.576216	4.9523	4	6	0.9093	0.21922	3.77244
3674	SEMICONDUCTORS AND RELATED DEVICES	9	11	1.0515	0.390205	2.83372	10	5	2.4537	0.70431	8.5489
3675	ELECTRONIC CAPACITORS	5	0	NA	--	--	1	0	NA	--	--
3676	ELECTRONIC RESISTORS	2	1	2.2291	0.192365	25.8325	2	0	NA	--	--
3677	ELECTRONIC COILS AND TRANSFORMERS	2	0	NA	--	--	0	0	NA	--	--
3679	ELECTRONIC COMPONENTS, NEC	3	4	0.8147	0.163332	4.06375	2	1	1.2649	0.103596	15.445
369	MISC ELECTRICAL MACHINERY/EQUIPMENT/SUPPLIES	3	3	0.8508	0.149818	4.83189	2	0	NA	--	--
3695	MAGNETIC AND OPTICAL RECORDING MEDIA	3	1	1.917	0.176523	20.819	1	0	NA	--	--
3699	ELECTRICAL EQUIPMENT AND SUPPLIES, NEC	0	2	NA	--	--	1	0	NA	--	--
37	TRANSPORTATION EQUIPMENT	106	123	0.7934	0.589105	1.06861	12	3	8.6726	2.03005	37.0506
371	MOTOR VEHICLES AND MOTOR VEHICLE EQUIPMENT	16	18	0.8147	0.396166	1.67574	1	0	NA	--	--
3711	MOTOR VEHICLES AND CAR BODIES	6	8	0.9065	0.303178	2.71088	1	0	NA	--	--
3713	TRUCK AND BUS BODIES	1	1	0.8028	0.0376904	17.1013	0	0	NA	--	--
3714	MOTOR VEHICLE PARTS AND ACCESSORIES	9	11	0.6505	0.25249	1.67642	0	0	NA	--	--
372	AIRCRAFT AND PARTS	41	43	0.8479	0.533918	1.34684	5	2	3.3729	0.542611	20.9671
3721	AIRCRAFT	15	10	1.4004	0.6028	3.25372	3	0	NA	--	--
3724	AIRCRAFT ENGINES AND ENGINE PARTS	20	23	0.7584	0.400731	1.43567	0	0	NA	--	--
3728	AIRCRAFT PARTS AND EQUIPMENT, NEC	10	11	0.8009	0.324626	1.97627	2	2	1.3555	0.147908	12.4225
373	SHIP AND BOAT BUILDING AND REPAIRING	49	53	0.9419	0.610757	1.45271	6	0	NA	--	--
3731	SHIP BUILDING AND REPAIRING	44	46	1.004	0.635836	1.5856	5	0	NA	--	--
3732	BOAT BUILDING AND REPAIRING	5	7	0.5846	0.164858	2.07344	1	0	NA	--	--
374	RAILROAD EQUIPMENT	2	2	1.1062	0.147171	8.31564	0	0	NA	--	--
3743	RAILROAD EQUIPMENT	2	2	1.1062	0.147171	8.31564	0	0	NA	--	--
376	GUIDED MISSILES AND SPACE VEHICLES AND PARTS	7	11	0.568	0.213429	1.51172	0	1	NA	--	--
3761	GUIDED MISSILES AND SPACE VEHICLES	3	7	0.4103	0.102086	1.64966	0	1	NA	--	--
3764	SPACE PROPULSION UNITS AND PARTS	1	1	0.8915	0.0512921	15.4966	0	0	NA	--	--
3769	SPACE VEHICLE EQUIPMENT, NEC	3	3	0.7999	0.15606	4.10003	0	0	NA	--	--
379	MISCELLANEOUS TRANSPORTATION EQUIPMENT	0	1	NA	--	--	0	0	NA	--	--
3799	TRANSPORTATION EQUIPMENT, NEC	0	1	NA	--	--	0	0	NA	--	--
38	INSTRUMENTS AND RELATED PRODUCTS	38	55	0.7934	0.502879	1.25186	4	11	0.3897	0.110787	1.37136
381	SEARCH DETECTION NAVIGATION GUIDANCE AERONAUTIC	13	27	0.5478	0.269699	1.11278	2	4	0.3209	0.050447	2.04134
3812	SEARCH AND NAVIGATION EQUIPMENT	13	27	0.5478	0.269699	1.11278	2	4	0.3209	0.050447	2.04134
382	LABORATORY APPARATUS AND ANALYTICAL OPTICAL, MEASURING AND CONTROLLING INSTRUMENTS	7	17	0.3798	0.14821	0.973664	1	3	0.8455	0.0808938	8.83817
3822	ENVIRONMENTAL CONTROLS	0	2	NA	--	--	0	1	NA	--	--
3824	FLUID METERS AND COUNTING DEVICES	2	0	NA	--	--	0	0	NA	--	--
3825	INSTRUMENTS TO MEASURE ELECTRICITY	3	8	0.482	0.122941	1.88977	1	1	2.839	0.16186	49.7977
3827	OPTICAL INSTRUMENTS AND LENSES	1	3	0.3591	0.0352695	3.65638	0	1	NA	--	--
3829	MEASURING AND CONTROLLING DEVICES, NEC	0	3	NA	--	--	0	0	NA	--	--
384	SURGICAL, MEDICAL, DENTAL INSTRUMENTS/SUPPLIES	7	8	1.46	0.489161	4.35804	0	2	NA	--	--
3841	SURGICAL AND MEDICAL INSTRUMENTS	3	1	6.5411	0.593162	72.1323	0	1	NA	--	--
3842	SURGICAL APPLIANCES AND SUPPLIES	1	2	0.7325	0.0585601	9.16303	0	0	NA	--	--
3843	DENTAL EQUIPMENT AND SUPPLIES	0	1	NA	--	--	0	0	NA	--	--
3844	X-RAY APPARATUS AND TUBES	1	2	1.2602	0.109366	14.5219	0	0	NA	--	--
3845	ELECTROMEDICAL EQUIPMENT	1	1	1.5027	0.0688154	32.8141	0	1	NA	--	--
385	OPHTHALMIC GOODS	2	2	2.0376	0.253007	16.4114	1	0	NA	--	--
3851	OPHTHALMIC GOODS	2	2	2.0376	0.253007	16.4114	1	0	NA	--	--
386	PHOTOGRAPHIC EQUIPMENT AND SUPPLIES	8	3	2.769	0.669009	11.4616	0	1	NA	--	--
3861	PHOTOGRAPHIC EQUIPMENT AND SUPPLIES	8	3	2.769	0.669009	11.4616	0	1	NA	--	--
387	WATCHES, CLOCKS, CLOCKWORK OPERATED DEVICES	4	0	NA	--	--	0	1	NA	--	--
3873	WATCHES, CLOCKS, WATCHCASES AND PARTS	4	0	NA	--	--	0	1	NA	--	--
39	MISCELLANEOUS MANUFACTURING INDUSTRIES	24	17	1.6916	0.865615	3.30611	5	13	0.3135	0.100718	0.976213
391	JEWELRY, SILVERWARE AND PLATED WARE	3	2	1.643	0.262576	10.2811	1	1	0.8232	0.0456113	14.8604
3911	JEWELRY, PRECIOUS METAL	0	2	NA	--	--	0	1	NA	--	--
3914	SILVERWARE AND PLATED WARE	3	0	NA	--	--	0	0	NA	--	--
3915	JEWELERS MATERIALS AND LAPIDARY WORK	0	0	NA	--	--	1	0	NA	--	--
393	MUSICAL INSTRUMENTS	2	0	NA	--	--	0	0	NA	--	--
3931	MUSICAL INSTRUMENTS	2	0	NA	--	--	0	0	NA	--	--
394	DOLLS, TOYS, GAMES AND SPORTING AND ATHLETIC GOODS	5	6	1.2354	0.350028	4.36072	3	5	0.6283	0.12383	3.18795
3942	DOLLS AND STUFFED TOYS	0	1	NA	--	--	2	1	1.8955	0.106237	33.822
3944	GAMES, TOYS, AND CHILDRENS VEHICLES	1	0	NA	--	--	0	1	NA	--	--
3949	SPORTING AND ATHLETIC GOODS, NEC	4	4	1.507	0.343281	6.61642	1	4	0.3246	0.0325567	3.23708
395	PENS, PENCILS AND OTHER ARTISTS MATERIALS	2	0	NA	--	--	0	0	NA	--	--
3951	PENS AND MECHANICAL PENCILS	1	0	NA	--	--	0	0	NA	--	--
3952	LEAD PENCILS AND ART GOODS	1	0	NA	--	--	0	0	NA	--	--
396	COSTUME JEWELRY, COSTUME NOVELTIES BUTTONS	2	1	1.7316	0.13501	22.2101	0	2	NA	--	--
3965	FASTENERS, BUTTONS, NEEDLES, AND PINS	2	1	1.7316	0.13501	22.2101	0	2	NA	--	--
399	MISCELLANEOUS MANUFACTURING INDUSTRIES	10	8	1.3627	0.500503	3.71039	1	6	0.1102	0.0117138	1.03742
3991	BROOMS AND BRUSHES	3	0	NA	--	--	0	0	NA	--	--
3993	SIGNS AND ADVERTISING SPECIALITIES	2	2	2.2416	0.304649	16.4938	0	2	NA	--	--
3995	BURIAL CASKETS	1	1	0.7185	0.0313628	16.4629	0	1	NA	--	--
3996	HARD SURFACE FLOOR COVERINGS, NEC	0	2	NA	--	--	0	0	NA	--	--
3999	MANUFACTURING INDUSTRIES, NEC	4	3	1.7578	0.37666	8.20403	1	3	0.389	0.0378626	3.99839
40	RAILROADS	19	21	0.9066	0.460606	1.78459	0	1	NA	--	--
401	RAILROADS	19	21	0.9066	0.460606	1.78459	0	1	NA	--	--
4011	RAILROADS, LINE-HAUL OPERATING	19	21	0.9066	0.460606	1.78459	0	1	NA	--	--
41	LOCAL AND INTERURBAN PASSENGER TRANSIT	27	28	0.8856	0.498693	1.57298	4	3	3.7139	0.657982	20.963
411	LOCAL AND SUBURBAN PASSENGER TRANSPORTATION	11	10	1.2015	0.477521	3.02323	2	0	NA	--	--
4111	LOCAL AND SUBURBAN TRANSIT	6	4	1.5761	0.375887	6.60886	1	0	NA	--	--
4119	LOCAL PASSENGER TRANSPORTATION, NEC	5	6	0.9836	0.290271	3.33342	1	0	NA	--	--
412	TAXICABS	11	11	0.7549	0.311542	1.82944	0	1	NA	--	--
4121	TAXICABS	11	11	0.7549	0.311542	1.82944	0	1	NA	--	--
413	INTERCITY AND RURAL BUS TRANSPORTATION	1	2	0.4507	0.0338778	5.99747	0	0	NA	--	--
4131	INTERCITY AND RURAL BUS TRANSPORTATION	1	2	0.4507	0.0338778	5.99747	0	0	NA	--	--
414	BUS CHARTER SERVICE	1	5	0.243	0.0271957	2.17152	0	2	NA	--	--
4142	BUS CHARTER SERVICE, EXCEPT LOCAL	0	1	NA	--	--	0	1	NA	--	--
415	SCHOOL BUSES	6	1	7.0443	0.76316	65.022	2	0	NA	--	--
4151	SCHOOL BUSES	6	1	7.0443	0.76316	65.022	2	0	NA	--	--
42	MOTOR FREIGHT TRANSPORTATION AND WAREHOUSING	64	76	0.8566	0.593069	1.23725	5	2	2.2431	0.409947	12.2741
421	TRUCKING AND COURIER SERVICES, EXCEPT AIR	64	74	0.8833	0.610316	1.27861	4	2	2.019	0.354103	11.5126
4212	LOCAL TRUCKING, WITHOUT STORAGE	28	31	0.9225	0.533019	1.59691	0	0	NA	--	--
4213	TRUCKING, EXCEPT LOCAL	31	33	1.0279	0.607023	1.7408	2	1	1.8821	0.165402	21.4178
4214	LOCAL TRUCKING WITH STORAGE	0	1	NA	--	--	0	0	NA	--	--
4215	COURIER SERVICES, EXCEPT BY AIR	6	9	0.4762	0.157305	1.4417	1	0	NA	--	--
422	PUBLIC WAREHOUSING AND STORAGE	0	2	NA	--	--	1	0	NA	--	--
4225	GENERAL WAREHOUSING AND STORAGE	0	2	NA	--	--	1	0	NA	--	--
43	US POSTAL SERVICE	36	31	1.252	0.740013	2.11842	6	7	0.7181	0.21134	2.44017
431	US POSTAL SERVICE	36	31	1.252	0.740013	2.11842	6	7	0.7181	0.21134	2.44017
4311	US POSTAL SERVICE	36	31	1.252	0.740013	2.11842	6	7	0.7181	0.21134	2.44017
44	WATER TRANSPORTATION	12	16	0.7943	0.353297	1.7859	1	0	NA	--	--
441	DEEP SEA FOREIGN TRANSPORTATION OF FREIGHT	4	10	0.4098	0.117238	1.43249	1	0	NA	--	--
4412	DEEP SEA FOREIGN TRANSPORTATION OF FREIGHT	4	10	0.4098	0.117238	1.43249	1	0	NA	--	--
444	WATER TRANSPORTATION OF FREIGHT, NEC	2	0	NA	--	--	0	0	NA	--	--
4449	WATER TRANSPORTATION OF FREIGHT, NEC	2	0	NA	--	--	0	0	NA	--	--
448	WATER TRANSPORTATION OF PASSENGERS	1	0	NA	--	--	1	0	NA	--	--
4482	FERRIES	1	0	NA	--	--	0	0	NA	--	--
4489	WATER PASSENGER TRANSPORTATION, NEC	0	0	NA	--	--	1	0	NA	--	--
449	SERVICES INCIDENTAL TO WATER TRANSPORTATION	6	6	0.9423	0.283555	3.13164	0	0	NA	--	--
4491	MARINE CARGO HANDLING	2	1	1.641	0.0975097	27.6177	0	0	NA	--	--
4492	TOWING AND TUGBOAT SERVICE	1	0	NA	--	--	0	0	NA	--	--
4493	MARINAS	3	5	0.5926	0.136392	2.57499	0	0	NA	--	--
45	TRANSPORTATION BY AIR	14	14	1.4662	0.661043	3.25222	3	5	0.666	0.135954	3.26338
451	AIR TRANSPORTATION, SCHEDULED AIR COURIER SERVICES	10	7	2.3726	0.837066	6.72526	2	3	0.8023	0.0987858	6.51737
4512	AIR TRANSPORTATION, SCHEDULED	9	5	3.2676	1.00084	10.6688	2	3	0.8023	0.0987858	6.51737
4513	AIR COURIER SERVICES	1	2	0.6436	0.056426	7.34322	0	0	NA	--	--
452	AIR TRANSPORTATION, NONSCHEDULED	2	2	1.4322	0.158976	12.9037	0	1	NA	--	--
4522	AIR TRANSPORTATION, NONSCHEDULED	2	2	1.4322	0.158976	12.9037	0	1	NA	--	--
458	AIRPORTS, FLYING FIELDS, AIRP0RT TERMINAL SERVICES	3	6	0.7122	0.168102	3.01751	1	1	0.7956	0.0487923	12.9755
4581	AIRPORTS, FLYING FIELDS, AND SERVICES	3	6	0.7122	0.168102	3.01751	1	1	0.7956	0.0487923	12.9755
46	PIPELINES, EXCEPT NATURAL GAS	1	0	NA	--	--	0	0	NA	--	--
461	PIPELINES, EXCEPT NATURAL GAS	1	0	NA	--	--	0	0	NA	--	--
4613	REFINED PETROLEUM PIPELINES	1	0	NA	--	--	0	0	NA	--	--
47	TRANSPORTATION SERVICES	8	4	1.9559	0.548603	6.9733	5	3	2.833	0.55518	14.4573
472	ARRANGEMENT OF PASSENGER TRANSPORTATION	0	1	NA	--	--	4	3	2.1555	0.382379	12.1511
4724	TRAVEL AGENCIES	0	1	NA	--	--	3	2	2.191	0.273684	17.5414
4725	TOUR OPERATORS	0	0	NA	--	--	1	1	2.0583	0.092281	45.9126
473	ARRANGEMENT OF TRANSPORTATION OF FREIGHT AND CARGO	2	3	0.6463	0.0912035	4.58038	1	0	NA	--	--
4731	FREIGHT TRANSPORTATION ARRANGEMENT	2	3	0.6463	0.0912035	4.58038	1	0	NA	--	--
478	MISCELLANEOUS SERVICES INCIDENTAL TO TRANSPORTATION	6	0	NA	--	--	0	0	NA	--	--
4785	INSPECTION AND FIXED FACILITIES	4	0	NA	--	--	0	0	NA	--	--
4789	TRANSPORTATION SERVICES, NEC	2	0	NA	--	--	0	0	NA	--	--
48	COMMUNICATIONS	28	30	0.9069	0.517347	1.59009	11	23	0.5546	0.246916	1.24572
481	TELEPHONE COMMUNICATIONS	20	21	0.9089	0.466524	1.77094	9	19	0.4869	0.200355	1.18341
4812	RADIOTELEPHONE COMMUNICATIONS	0	1	NA	--	--	0	0	NA	--	--
4813	TELEPHONE COMMUNICATIONS, EXCEPT RADIO	19	20	0.8996	0.455783	1.77588	9	19	0.4869	0.200355	1.18341
482	TELEGRAPH AND OTHER MESSAGE COMMUNICATIONS	2	0	NA	--	--	0	2	NA	--	--
4822	TELEGRAPH AND OTHER COMMUNICATIONS	2	0	NA	--	--	0	2	NA	--	--
483	RADIO AND TELEVISION BROADCASTING STATIONS	5	6	0.6805	0.192253	2.40939	1	2	1.108	0.0838797	14.6375
4832	RADIO BROADCASTING STATIONS	3	4	0.5437	0.112747	2.62266	0	1	NA	--	--
4833	TELEVISION BROADCASTING STATIONS	2	2	1.0341	0.12423	8.60901	1	1	3.5458	0.14647	85.8414
484	CABLE AND OTHER PAY TELEVISION SERVICES	2	4	0.4747	0.0767903	2.93547	1	0	NA	--	--
4841	CABLE AND OTHER PAY TV SERVICES	2	4	0.4747	0.0767903	2.93547	1	0	NA	--	--
49	ELECTRIC, GAS, AND SANITARY SERVICES	48	49	0.993	0.640727	1.53913	5	9	0.3806	0.116607	1.24287
491	ELECTRIC SERVICES	16	24	0.6907	0.348023	1.37116	5	6	0.6465	0.180081	2.32126
4911	ELECTRIC SERVICES	16	24	0.6907	0.348023	1.37116	5	6	0.6465	0.180081	2.32126
492	GAS PRODUCTION AND DISTRIBUTION	4	3	1.0066	0.194823	5.20112	0	1	NA	--	--
4922	NATURAL GAS TRANSMISSION	1	0	NA	--	--	0	0	NA	--	--
4924	NATURAL GAS DISTRIBUTION	2	2	0.6951	0.0803164	6.01714	0	1	NA	--	--
4925	GAS PRODUCTION AND/OR DISTRIBUTION	1	0	NA	--	--	0	0	NA	--	--
493	COMBINATION ELECTRIC GAS, OTHER UTILITY SERV	0	1	NA	--	--	0	0	NA	--	--
4931	ELECTRIC AND OTHER SERVICES COMBINED	0	1	NA	--	--	0	0	NA	--	--
494	WATER SUPPLY	8	4	1.6506	0.47413	5.74668	0	1	NA	--	--
4941	WATER SUPPLY	8	4	1.6506	0.47413	5.74668	0	1	NA	--	--
495	SANITARY SERVICES	16	16	1.1515	0.54235	2.44495	0	1	NA	--	--
4952	SEWERAGE SYSTEMS	1	4	0.2398	0.0262579	2.19072	0	0	NA	--	--
4953	REFUSE SYSTEMS	12	12	1.3861	0.583015	3.29548	0	1	NA	--	--
4959	SANITARY SERVICES, NEC	3	0	NA	--	--	0	0	NA	--	--
50	WHOLESALE TRADE, DURABLE GOODS	71	94	0.7902	0.56136	1.11244	10	13	1.096	0.429303	2.79839
501	MOTOR VEHICLES, PARTS AND SUPPLIES	9	15	0.6567	0.264051	1.63355	0	1	NA	--	--
5012	AUTOMOBILES AND OTHER MOTOR VEHICLES	2	1	2.2803	0.18061	28.7919	0	0	NA	--	--
5013	MOTOR VEHICLE SUPPLIES AND NEW PARTS	3	7	0.5744	0.130133	2.53538	0	1	NA	--	--
5014	TIRES AND TUBES	1	1	1.8568	0.078641	43.8421	0	0	NA	--	--
5015	MOTOR VEHICLE PARTS, USED	2	4	0.3589	0.0561132	2.29599	0	0	NA	--	--
502	FURNITURE AND HOMEFURNISHINGS	6	4	1.5897	0.416861	6.06252	2	1	1.2735	0.0908056	17.8603
5021	FURNITURE	4	1	3.2132	0.341159	30.2646	0	0	NA	--	--
5023	HOMEFURNISHINGS	2	2	1.0621	0.144462	7.81009	2	1	1.2735	0.0908056	17.8603
503	LUMBER AND OTHER CONSTRUCTION MATERIALS	16	17	0.9392	0.457657	1.92777	0	0	NA	--	--
5031	LUMBER, PLYWOOD, AND MILLWORK	8	10	0.6854	0.257565	1.82391	0	0	NA	--	--
5032	BRICK, STONE, AND RELATED MATERIALS	5	2	3.197	0.602896	16.9531	0	0	NA	--	--
5039	CONSTRUCTION MATERIALS, NEC	2	2	1.0697	0.130266	8.78423	0	0	NA	--	--
504	PROFESSIONAL AND COMMERCIAL EQUIPMENT SUPPLIES	8	14	0.7396	0.293394	1.86476	2	5	0.4664	0.0726185	2.99657
5043	PHOTOGRAPHIC EQUIPMENT AND SUPPLIES	0	1	NA	--	--	0	0	NA	--	--
5044	OFFICE EQUIPMENT	4	3	1.1341	0.233819	5.50154	1	2	0.3655	0.0272925	4.89581
5045	COMPUTERS, PERIPHERALS AND SOFTWARE	0	5	NA	--	--	1	1	0.8302	0.0456749	15.0928
5046	COMMERCIAL EQUIPMENT, NEC	0	3	NA	--	--	0	1	NA	--	--
5047	MEDICAL AND HOSPITAL EQUIPMENT	4	1	4.5086	0.473818	42.9023	0	1	NA	--	--
5049	PROFESSIONAL EQUIPMENT, NEC	0	1	NA	--	--	0	0	NA	--	--
505	METALS AND MINERALS, EXCEPT PETROLEUM	1	2	0.5508	0.0467618	6.48995	0	0	NA	--	--
5051	METALS SERVICE CENTERS AND OFFICES	0	1	NA	--	--	0	0	NA	--	--
5052	COAL, OTHER MINERALS, AND ORES	1	1	0.9912	0.056205	17.4808	0	0	NA	--	--
506	ELECTRICAL GOODS	6	13	0.4418	0.16118	1.21118	1	1	2.2835	0.127814	40.7981
5063	ELECTRICAL APPARATUS AND EQUIPMENT	1	2	0.7289	0.0628762	8.44999	0	0	NA	--	--
5064	ELECTRICAL APPLIANCES, TV AND RADIOS	1	3	0.1879	0.0178259	1.98216	0	0	NA	--	--
5065	ELECTRONIC PARTS AND EQUIPMENT	3	6	0.5083	0.121788	2.12206	0	0	NA	--	--
507	HARDWARE, PLUMBING AND HEATING EQUIPMENT SUPPLIES	10	7	1.3386	0.484918	3.69547	0	2	NA	--	--
5072	HARDWARE	2	2	1.2358	0.163932	9.31717	0	1	NA	--	--
5074	PLUMBING AND HYDRONIC HEATING SUPPLIES	8	2	3.2175	0.647391	15.9918	0	1	NA	--	--
5075	WARM AIR HEATING AND AIR-CONDITIONING	0	1	NA	--	--	0	0	NA	--	--
5078	REFRIGERATION EQUIPMENT AND SUPPLIES	0	1	NA	--	--	0	0	NA	--	--
508	MACHINERY, EQUIPMENT AND SUPPLIES	13	16	1.0211	0.463562	2.24958	2	2	1.0037	0.122811	8.20454
5082	CONSTRUCTION AND MINING MACHINERY	1	0	NA	--	--	0	0	NA	--	--
5083	FARM AND GARDEN MACHINERY	2	4	0.608	0.102071	3.62253	1	2	0.3466	0.0289283	4.15345
5084	INDUSTRIAL MACHINERY AND EQUIPMENT	6	5	1.0489	0.303358	3.62734	0	0	NA	--	--
5085	INDUSTRIAL SUPPLIES	4	1	6.3882	0.693008	58.8874	1	0	NA	--	--
5087	SERVICE ESTABLISHMENT EQUIPMENT	0	4	NA	--	--	0	0	NA	--	--
5088	TRANSPORTATION EQUIPMENT AND SUPPLIES	1	1	1.5754	0.0699142	35.5031	0	0	NA	--	--
509	MISCELLANEOUS DURABLE GOODS	6	10	0.6099	0.208036	1.78817	3	1	10.592	1.04753	107.113
5091	SPORTING AND RECREATIONAL GOODS	1	2	1.0749	0.0919105	12.5716	0	0	NA	--	--
5092	TOYS, HOBBY GOODS AND SUPPLIES	0	2	NA	--	--	2	0	NA	--	--
5093	SCRAP AND WASTE MATERIALS	4	5	0.5488	0.137946	2.18399	1	1	3.3701	0.197634	57.4682
5094	JEWELRY AND PRECIOUS STONES	0	1	NA	--	--	0	0	NA	--	--
5099	DURABLE GOODS, NEC	1	0	NA	--	--	0	0	NA	--	--
51	WHOLESALE TRADE, NONDURABLE GOODS	99	121	0.8514	0.631461	1.1481	16	14	1.4901	0.667925	3.32456
511	PAPER AND PAPER PRODUCTS	5	6	0.9827	0.26442	3.65243	1	0	NA	--	--
5112	STATIONERY AND OFFICE SUPPLIES	2	3	0.7078	0.0991014	5.05536	1	0	NA	--	--
5113	INDUSTRIAL AND PERSONAL SERVICE PAPER	1	1	0.6136	0.028676	13.1316	0	0	NA	--	--
512	DRUGS, DRUG PROPRIETARIES, DRUGGISTS SUNDRIES	3	2	1.5175	0.239785	9.60401	2	2	2.1723	0.261831	18.0234
5122	DRUGS, DRUG PROPRIETARIES, AND DRUGGIST SUNDRIES	3	2	1.5175	0.239785	9.60401	2	2	2.1723	0.261831	18.0234
513	APPAREL, PIECE GOODS AND NOTIONS	5	5	1.0422	0.286469	3.79166	3	2	2.1601	0.27556	16.934
5131	PIECE GOODS AND NOTIONS	1	1	1.1259	0.0642292	19.7392	0	0	NA	--	--
5137	WOMENS AND CHILDRENS CLOTHING	1	1	0.5139	0.0302789	8.72363	1	0	NA	--	--
5139	FOOTWEAR	3	1	3.7484	0.368792	38.1004	1	0	NA	--	--
514	GROCERIES AND RELATED PRODUCTS	55	65	0.8533	0.576205	1.26383	6	5	1.227	0.330143	4.56061
5141	GROCERIES, GENERAL LINE	15	15	0.8448	0.394101	1.81131	1	3	0.2142	0.0190629	2.40862
5142	PACKAGED FROZEN FOODS	3	1	7.7025	0.713758	83.1223	0	0	NA	--	--
5143	DAIRY PRODUCTS, EXCEPT DRIED OR CANNED	14	5	3.2885	1.1467	9.431	0	0	NA	--	--
5144	POULTRY AND POULTRY PRODUCTS	0	3	NA	--	--	0	0	NA	--	--
5145	CONFECTIONERY	0	1	NA	--	--	0	0	NA	--	--
5146	FISH AND SEAFOODS	3	9	0.3245	0.0837313	1.25818	2	0	NA	--	--
5147	MEATS AND MEAT PRODUCTS	7	5	1.6263	0.496831	5.32363	0	1	NA	--	--
5148	FRESH FRUITS AND VEGETABLES	6	6	0.9623	0.290677	3.18608	1	0	NA	--	--
5149	GROCERIES AND RELATED PRODUCTS, NEC	9	20	0.3802	0.164343	0.879729	3	0	NA	--	--
515	FARM-PRODUCT RAW MATERIALS	4	3	1.3898	0.253769	7.61159	1	1	1.2668	0.0770007	20.8414
5153	GRAIN AND FIELD BEANS	3	3	1.1923	0.198034	7.17959	1	1	1.2668	0.0770007	20.8414
5154	LIVESTOCK	1	0	NA	--	--	0	0	NA	--	--
516	CHEMICALS AND ALLIED PRODUCTS	5	3	1.742	0.397734	7.63024	1	0	NA	--	--
5162	PLASTICS MATERIALS AND BASIC SHAPES	1	0	NA	--	--	0	0	NA	--	--
5169	CHEMICALS AND ALLIED PRODUCTS, NEC	4	3	1.4414	0.305378	6.80396	1	0	NA	--	--
517	PETROLEUM AND PETROLEUM PRODUCTS	10	14	0.9732	0.412191	2.29795	1	1	1.6271	0.0988139	26.7956
5171	PETROLEUM BULK STATIONS AND TERMINALS	2	3	0.8521	0.133691	5.43171	0	0	NA	--	--
5172	PETROLEUM PRODUCTS, NEC	3	8	0.6195	0.157433	2.43824	1	0	NA	--	--
518	BEER, WINE AND DISTILLED ALCOHOLIC BEVERAGES	5	4	1.0912	0.2707	4.3987	0	1	NA	--	--
5181	BEER AND ALE	3	1	3.5042	0.353602	34.7283	0	1	NA	--	--
5182	WINE AND DISTILLED BEVERAGES	2	1	1.1143	0.0968074	12.8281	0	0	NA	--	--
519	MISCELLANEOUS NONDURABLE GOODS	12	21	0.5484	0.258382	1.16408	2	3	0.7975	0.120462	5.28082
5191	FARM SUPPLIES	6	9	0.7933	0.269856	2.33265	0	2	NA	--	--
5192	BOOKS, PERIODICALS, AND NEWSPAPERS	3	4	0.6441	0.131211	3.1627	0	0	NA	--	--
5193	FLOWERS AND FLORISTS SUPPLIES	1	3	0.5327	0.0509274	5.57383	0	0	NA	--	--
5194	TOBACCO AND TOBACCO PRODUCTS	1	2	0.2719	0.0237834	3.1097	1	0	NA	--	--
5199	NONDURABLE GOODS, NEC	1	4	0.1691	0.0175191	1.63328	1	1	1.0684	0.0570242	20.0192
52	BUILDING MATERIALS, HARDWARE, GARDEN SUPPLY & MOBILE HOME	28	26	0.9499	0.53524	1.68584	2	10	0.2888	0.0594416	1.40397
521	LUMBER AND OTHER BUILDING MATERIALS DEALERS	8	15	0.4799	0.196104	1.17441	1	2	1.3391	0.113781	15.7618
5211	LUMBER AND OTHER BUILDING MATERIALS	8	15	0.4799	0.196104	1.17441	1	2	1.3391	0.113781	15.7618
523	PAINT, GLASS AND WALLPAPER STORES	6	1	6.9505	0.741058	65.1913	0	1	NA	--	--
5231	PAINT, GLASS, AND WALLPAPER STORES	6	1	6.9505	0.741058	65.1913	0	1	NA	--	--
525	HARDWARE STORES	7	8	0.8096	0.274311	2.38965	1	6	0.2411	0.0275999	2.10762
5251	HARDWARE STORES	7	8	0.8096	0.274311	2.38965	1	6	0.2411	0.0275999	2.10762
526	RETAIL NURSERIES, LAWN GARDEN SUPPLY STORES	2	1	2.0893	0.162301	26.8969	0	2	NA	--	--
5261	RETAIL NURSERIES AND GARDEN STORES	2	1	2.0893	0.162301	26.8969	0	2	NA	--	--
527	MOBILE HOME DEALERS	2	0	NA	--	--	0	0	NA	--	--
5271	MOBILE HOME DEALERS	2	0	NA	--	--	0	0	NA	--	--
53	GENERAL MERCHANDISE STORES	55	59	0.9274	0.620373	1.38663	46	62	1.12	0.703521	1.78309
531	DEPARTMENT STORES	33	32	1.0305	0.611266	1.73733	27	32	1.1181	0.612759	2.04053
5311	DEPARTMENT STORES	33	32	1.0305	0.611266	1.73733	27	32	1.1181	0.612759	2.04053
533	VARIETY STORES	9	17	0.5377	0.226375	1.27762	16	23	0.8778	0.422418	1.82419
5331	VARIETY STORES	9	17	0.5377	0.226375	1.27762	16	23	0.8778	0.422418	1.82419
539	MISCELLANEOUS GENERAL MERCHANDISE STORES	17	15	1.0542	0.501373	2.21689	5	15	0.7706	0.254278	2.3355
5399	MISC GENERAL MERCHANDISE STORES	17	15	1.0542	0.501373	2.21689	5	15	0.7706	0.254278	2.3355
54	FOOD STORES	90	120	0.789	0.580064	1.0732	35	41	1.3048	0.757971	2.24627
541	GROCERY STORES	81	101	0.8221	0.593474	1.13892	26	34	1.2167	0.663577	2.2309
5411	GROCERY STORES	81	101	0.8221	0.593474	1.13892	26	34	1.2167	0.663577	2.2309
542	MEAT FISH (SEAFOOD) MARKETS, INCLUDING FREEZER PROVISIONERS	2	6	0.4527	0.0892024	2.29823	1	1	1.6245	0.0990625	26.6425
5421	MEAT AND FISH MARKETS	2	6	0.4527	0.0892024	2.29823	1	1	1.6245	0.0990625	26.6425
543	FRUIT AND VEGETABLE MARKETS	1	3	0.5224	0.0473433	5.76436	0	1	NA	--	--
5431	FRUIT AND VEGETABLE MARKETS	1	3	0.5224	0.0473433	5.76436	0	1	NA	--	--
544	CANDY, NUT AND CONFECTIONERY STORES	0	1	NA	--	--	2	4	0.7799	0.1139	5.34078
5441	CANDY, NUT, AND CONFECTIONERY STORES	0	1	NA	--	--	2	4	0.7799	0.1139	5.34078
545	DAIRY PRODUCTS STORES	0	1	NA	--	--	2	0	NA	--	--
5451	DAIRY PRODUCTS STORES	0	1	NA	--	--	2	0	NA	--	--
546	RETAIL BAKERIES	6	11	0.7172	0.245789	2.09314	4	4	0.739	0.165986	3.29084
5461	RETAIL BAKERIES	6	11	0.7172	0.245789	2.09314	4	4	0.739	0.165986	3.29084
549	MISCELLANEOUS FOOD STORES	2	0	NA	--	--	0	0	NA	--	--
5499	MISCELLANEOUS FOOD STORES	2	0	NA	--	--	0	0	NA	--	--
55	AUTOMOTIVE DEALERS AND GASOLINE SERVICE STATIONS	113	119	0.8941	0.665495	1.20142	6	11	0.6612	0.222821	1.9626
551	MOTOR VEHICLE DEALERS (NEW AND USED)	38	42	0.8791	0.546264	1.41502	4	3	1.278	0.267877	6.09733
5511	NEW AND USED CAR DEALERS	38	42	0.8791	0.546264	1.41502	4	3	1.278	0.267877	6.09733
552	MOTOR VEHICLE DEALERS (USED ONLY)	2	4	0.4042	0.0654646	2.49614	0	0	NA	--	--
5521	USED CAR DEALERS	2	4	0.4042	0.0654646	2.49614	0	0	NA	--	--
553	AUTO AND HOME SUPPLY STORES	11	23	0.3844	0.178267	0.829019	1	2	0.5377	0.0426592	6.77765
5531	AUTO AND HOME SUPPLY STORES	11	23	0.3844	0.178267	0.829019	1	2	0.5377	0.0426592	6.77765
554	GASOLINE SERVICE STATIONS	73	63	1.0726	0.73621	1.56293	1	5	0.5267	0.0571172	4.85726
5541	GASOLINE SERVICE STATIONS	73	63	1.0726	0.73621	1.56293	1	5	0.5267	0.0571172	4.85726
555	BOAT DEALERS	2	2	0.7067	0.0792139	6.30649	0	1	NA	--	--
5551	BOAT DEALERS	2	2	0.7067	0.0792139	6.30649	0	1	NA	--	--
556	RECREATIONAL VEHICLE DEALERS	0	1	NA	--	--	0	0	NA	--	--
5561	RECREATIONAL VEHICLE DEALERS	0	1	NA	--	--	0	0	NA	--	--
559	AUTOMOTIVE DEALERS, NEC	0	1	NA	--	--	0	0	NA	--	--
5599	AUTOMOTIVE DEALERS, NEC	0	1	NA	--	--	0	0	NA	--	--
56	APPAREL AND ACCESSORY STORES	11	18	0.7612	0.339401	1.70738	8	21	0.6711	0.276239	1.6307
561	MENS AND BOYS CLOTHING ACCESSORY STORES	1	2	0.9563	0.0859308	10.6443	0	1	NA	--	--
5611	MENS AND BOYS CLOTHING STORES	1	2	0.9563	0.0859308	10.6443	0	1	NA	--	--
562	WOMENS CLOTHING STORES	1	2	0.4093	0.0267365	6.26796	3	5	1.6348	0.337214	7.92596
5621	WOMENS CLOTHING STORES	1	2	0.4093	0.0267365	6.26796	3	5	1.6348	0.337214	7.92596
563	WOMENS ACCESSORY AND SPECIALTY STORES	0	0	NA	--	--	0	1	NA	--	--
5632	WOMENS ACCESSORY AND SPECIALTY STORES	0	0	NA	--	--	0	1	NA	--	--
564	CHILDRENS AND INFANTS WEAR STORES	0	0	NA	--	--	1	0	NA	--	--
5641	CHILDRENS AND INFANTS WEAR STORES	0	0	NA	--	--	1	0	NA	--	--
565	FAMILY CLOTHING STORES	5	10	0.5955	0.193096	1.83705	2	10	0.2827	0.0585141	1.36603
5651	FAMILY CLOTHING STORES	5	10	0.5955	0.193096	1.83705	2	10	0.2827	0.0585141	1.36603
566	SHOE STORES	3	3	1.1916	0.207677	6.83712	1	3	0.622	0.0575837	6.71936
5661	SHOE STORES	3	3	1.1916	0.207677	6.83712	1	3	0.622	0.0575837	6.71936
569	MISCELLANEOUS APPAREL AND ACCESSORY STORES	1	0	NA	--	--	1	0	NA	--	--
5699	MISC APPAREL AND ACCESSORY STORES	1	0	NA	--	--	1	0	NA	--	--
57	FURNITURE, HOME FURNISHINGS AND EQUIPMENT STORES	22	26	0.8029	0.43541	1.48073	12	8	1.6321	0.596331	4.46713
571	HOME FURNITURE AND FURNISHINGS STORES	8	16	0.4907	0.198606	1.21242	9	4	2.282	0.588316	8.85217
5712	FURNITURE STORES	3	13	0.261	0.070526	0.965905	3	3	1.0399	0.174042	6.21365
5713	FLOOR COVERING STORES	2	0	NA	--	--	1	0	NA	--	--
5714	DRAPERY AND UPHOLSTERY STORES	1	0	NA	--	--	1	0	NA	--	--
5719	MISC HOMEFURNISHINGS STORES	2	2	0.6464	0.0826719	5.05468	2	1	3.3689	0.146466	77.4925
572	HOUSEHOLD APPLIANCE STORES	5	2	3.5291	0.666603	18.6845	1	2	0.6881	0.0587806	8.05538
5722	HOUSEHOLD APPLIANCE STORES	5	2	3.5291	0.666603	18.6845	1	2	0.6881	0.0587806	8.05538
573	RADIO, TV, CONSUMER ELECTRONICS, MUSIC STORES	11	9	1.0025	0.391644	2.56633	1	2	0.9393	0.0829798	10.6339
5731	RADIO, TV, AND ELECTRONIC STORES	6	6	0.9015	0.267472	3.03908	1	0	NA	--	--
5734	COMPUTER AND SOFTWARE STORES	1	1	0.8028	0.0377619	17.0691	0	1	NA	--	--
5735	RECORD AND PRERECORDED TAPE STORES	1	0	NA	--	--	0	0	NA	--	--
5736	MUSICAL INSTRUMENT STORES	3	2	0.9524	0.153283	5.91882	0	1	NA	--	--
58	EATING AND DRINKING PLACES	78	79	0.9801	0.6875	1.39723	50	77	0.7441	0.468968	1.18078
581	EATING AND DRINKING PLACES	78	79	0.9801	0.6875	1.39723	50	77	0.7441	0.468968	1.18078
5812	EATING PLACES	76	71	1.0747	0.74549	1.54955	50	76	0.756	0.47575	1.20151
5813	DRINKING PLACES	4	12	0.2553	0.0761889	0.855918	1	2	0.8215	0.066017	10.2247
59	MISCELLANEOUS RETAIL	57	76	0.8088	0.554538	1.17987	25	53	0.6689	0.384642	1.16338
591	DRUG STORES AND PROPRIETARY STORES	15	9	1.9414	0.793211	4.75201	7	14	0.8772	0.314926	2.44372
5912	DRUG STORES AND PROPRIETARY STORES	15	9	1.9414	0.793211	4.75201	7	14	0.8772	0.314926	2.44372
592	LIQUOR STORES	4	4	1.2904	0.300035	5.54986	0	2	NA	--	--
5921	LIQUOR STORES	4	4	1.2904	0.300035	5.54986	0	2	NA	--	--
593	USED MERCHANDISE STORES	3	8	0.5125	0.125374	2.0951	2	4	0.5752	0.0953542	3.47029
5932	USED MERCHANDISE STORES	3	8	0.5125	0.125374	2.0951	2	4	0.5752	0.0953542	3.47029
594	MISCELLANEOUS SHOPPING GOODS STORES	12	20	0.55	0.257228	1.17607	8	21	0.7529	0.30412	1.86414
5941	SPORTING GOODS AND BICYCLE SHOPS	4	4	1.1905	0.288511	4.91277	0	1	NA	--	--
5942	BOOK STORES	1	1	1.0789	0.0592597	19.6437	2	4	1.5676	0.250309	9.8177
5943	STATIONERY STORES	0	1	NA	--	--	1	0	NA	--	--
5944	JEWELRY STORES	0	4	NA	--	--	1	4	0.738	0.0769653	7.07664
5945	HOBBY, TOY, AND GAME SHOPS	1	2	0.4147	0.0347791	4.94632	1	0	NA	--	--
5946	CAMERA AND PHOTOGRAPHIC SUPPLY STORES	2	3	0.5224	0.0776709	3.51481	0	1	NA	--	--
5947	GIFT, NOVELTY, AND SOUVENIR SHOPS	4	5	0.6597	0.157657	2.76126	3	8	0.6859	0.167937	2.80149
5949	SEWING, NEEDLEWORK, AND PIECE GOODS	0	0	NA	--	--	0	3	NA	--	--
596	NONSTORE RETAILERS	7	15	0.4908	0.189939	1.26871	5	12	0.5807	0.183983	1.83315
5961	CATALOG AND MAIL-ORDER HOUSES	2	5	0.2863	0.0500884	1.63708	3	3	1.6125	0.28768	9.03878
5962	MERCHANDISING MACHINE OPERATORS	1	1	1.0801	0.0638386	18.2774	0	0	NA	--	--
5963	DIRECT SELLING ESTABLISHMENTS	4	9	0.5749	0.168804	1.95812	2	9	0.2805	0.0545893	1.44192
598	FUEL DEALERS	13	12	1.1894	0.517444	2.73424	0	2	NA	--	--
5983	FUEL OIL DEALERS	6	6	1.0898	0.330346	3.59522	0	1	NA	--	--
5984	LIQUEFIED PETROLEUM GAS DEALERS	3	1	3.9128	0.392346	39.0229	0	0	NA	--	--
5989	FUEL DEALERS, NEC	4	2	2.0005	0.313831	12.753	0	1	NA	--	--
599	RETAIL STORES, NEC	6	14	0.3711	0.134889	1.02121	5	4	0.9869	0.221478	4.39787
5992	FLORISTS	0	6	NA	--	--	2	1	1.1054	0.0767876	15.9157
5995	OPTICAL GOODS STORES	1	0	NA	--	--	0	1	NA	--	--
5999	MISC RETAIL STORES, NEC	5	8	0.4777	0.149984	1.52163	3	2	1.0724	0.157218	7.31543
60	DEPOSITORY INSTITUTIONS	25	25	1.1282	0.623526	2.04152	25	29	0.933	0.507424	1.71568
602	COMMERCIAL BANKS	22	23	1.0672	0.570734	1.99575	21	25	0.8264	0.431658	1.58222
6021	NATIONAL COMMERCIAL BANKS	7	10	0.7642	0.267441	2.1841	10	9	1.235	0.452923	3.36776
6022	STATE COMMERCIAL BANKS	0	1	NA	--	--	0	0	NA	--	--
6029	COMMERCIAL BANKS, NEC	0	0	NA	--	--	1	0	NA	--	--
603	SAVINGS INSTITUTIONS	3	1	3.1989	0.316995	32.2815	4	3	1.9069	0.379922	9.57166
6036	SAVINGS INSTITUTIONS, EXCEPT FEDERAL	0	1	NA	--	--	0	1	NA	--	--
606	CREDIT UNIONS	0	3	NA	--	--	1	1	1.9998	0.0656147	60.9515
6061	FEDERAL CREDIT UNIONS	0	2	NA	--	--	0	0	NA	--	--
6062	STATE CREDIT UNIONS	0	0	NA	--	--	1	0	NA	--	--
609	FUNCTIONS RELATED TO DEPOSITORY BANKING	0	0	NA	--	--	1	0	NA	--	--
6091	NONDEPOSIT TRUST FACILITIES	0	0	NA	--	--	1	0	NA	--	--
61	NONDEPOSITORY CREDIT INSTITUTIONS	9	10	1.1444	0.445868	2.93742	3	2	1.8981	0.258434	13.9413
611	FEDERAL AND FEDERALLY-SPONSORED CREDIT AGENCIES	2	0	NA	--	--	0	0	NA	--	--
6111	FEDERAL AND FEDERALLY-SPONSORED CREDIT AGENCIES	2	0	NA	--	--	0	0	NA	--	--
614	PERSONAL CREDIT INSTITUTIONS	3	5	0.9336	0.213179	4.08865	1	1	0.6837	0.0297632	15.7083
6141	PERSONAL CREDIT INSTITUTIONS	3	5	0.9336	0.213179	4.08865	1	1	0.6837	0.0297632	15.7083
615	BUSINESS CREDIT INSTITUTIONS	3	2	1.1901	0.187133	7.5699	1	1	2.6472	0.137987	50.7862
6153	SHORT-TERM BUSINESS CREDIT	1	1	0.588	0.0333162	10.3777	0	1	NA	--	--
6159	MISC BUSINESS CREDIT INSTITUTIONS	2	0	NA	--	--	1	0	NA	--	--
616	MORTGAGE BANKERS AND BROKERS	2	3	0.923	0.148095	5.7533	0	0	NA	--	--
6162	MORTGAGE BANKERS AND CORRESPONDENTS	2	1	2.4345	0.211733	27.9939	0	0	NA	--	--
6163	LOAN BROKERS	0	1	NA	--	--	0	0	NA	--	--
62	SECURITY, COMMODITY BROKERS AND SERVICES	3	13	0.2756	0.0754498	1.00717	3	1	1.5145	0.137403	16.694
621	SECURITY BROKERS/DEALERS/FLOTATION COMPANIES	2	4	0.6376	0.107386	3.78681	3	1	1.5145	0.137403	16.694
6211	SECURITY BROKERS AND DEALERS	2	4	0.6376	0.107386	3.78681	3	1	1.5145	0.137403	16.694
622	COMMODITY CONTRACTS BROKERS AND DEALERS	0	1	NA	--	--	0	0	NA	--	--
6221	COMMODITY CONTRACTS BROKERS, DEALERS	0	1	NA	--	--	0	0	NA	--	--
628	SERVICES ALLIED WITH EXCHANGE OF SECURITIES OR COMMODITIES	1	6	0.2542	0.0294376	2.19599	0	0	NA	--	--
6282	INVESTMENT ADVICE	1	6	0.2542	0.0294376	2.19599	0	0	NA	--	--
63	INSURANCE CARRIERS	29	30	1.207	0.700291	2.08048	22	17	1.6797	0.807874	3.49265
631	LIFE INSURANCE	11	6	2.5597	0.897749	7.29844	7	3	2.9112	0.647325	13.0933
6311	LIFE INSURANCE	11	6	2.5597	0.897749	7.29844	7	3	2.9112	0.647325	13.0933
632	ACCIDENT AND HEALTH INSURANCE MEDICAL SERVICE PLANS	1	2	0.5773	0.0463321	7.19365	5	4	1.4504	0.32364	6.50047
6321	ACCIDENT AND HEALTH INSURANCE	1	2	0.5773	0.0463321	7.19365	3	3	0.8424	0.137324	5.16766
6324	HOSPITAL AND MEDICAL SERVICE PLANS	0	0	NA	--	--	1	1	3.2295	0.148852	70.0714
633	FIRE, MARINE AND CASUALTY INSURANCE	1	1	1.6795	0.103168	27.3419	0	4	NA	--	--
6331	FIRE, MARINE AND CASUALTY INSURANCE	1	1	1.6795	0.103168	27.3419	0	4	NA	--	--
635	SURETY INSURANCE	0	1	NA	--	--	0	0	NA	--	--
6351	SURETY INSURANCE	0	1	NA	--	--	0	0	NA	--	--
636	TITLE INSURANCE	1	0	NA	--	--	0	0	NA	--	--
6361	TITLE INSURANCE	1	0	NA	--	--	0	0	NA	--	--
637	PENSION, HEALTH AND WELFARE FUNDS	0	0	NA	--	--	1	1	1.3006	0.0586072	28.8652
6371	PENSION, HEALTH AND WELFARE FUNDS	0	0	NA	--	--	1	1	1.3006	0.0586072	28.8652
64	INSURANCE AGENTS, BROKERS AND SERVICE	10	6	1.5712	0.548372	4.5021	3	1	2.5192	0.209029	30.3628
641	INSURANCE AGENTS, BROKERS AND SERVICE	10	6	1.5712	0.548372	4.5021	3	1	2.5192	0.209029	30.3628
6411	INSURANCE AGENTS, BROKERS AND SERVICE	10	6	1.5712	0.548372	4.5021	3	1	2.5192	0.209029	30.3628
65	REAL ESTATE	38	49	0.7416	0.467893	1.17568	10	12	1.2618	0.477484	3.33492
651	REAL ESTATE OPERATORS (EXCEPT DEVELOPERS) AND LESSORS	16	11	1.2516	0.543184	2.88407	2	1	5.739	0.43895	75.0352
6512	NONRESIDENTIAL BUILDING OPERATORS	4	4	0.7101	0.157118	3.21002	2	0	NA	--	--
6513	APARTMENT BUILDING OPERATORS	8	5	1.2805	0.394223	4.15935	0	1	NA	--	--
6514	DWELLING OPERATORS, EXCEPT APARTMENTS	3	0	NA	--	--	0	0	NA	--	--
653	REAL ESTATE AGENTS AND MANAGERS	16	34	0.4868	0.259604	0.912864	7	9	1.1071	0.34702	3.53251
6531	REAL ESTATE AGENTS AND MANAGERS	16	34	0.4868	0.259604	0.912864	7	9	1.1071	0.34702	3.53251
654	TITLE ABSTRACT OFFICES	0	0	NA	--	--	0	1	NA	--	--
6541	TITLE ABSTRACT OFFICES	0	0	NA	--	--	0	1	NA	--	--
655	LAND SUBDIVIDERS AND DEVELOPERS	8	7	1.1335	0.3895	3.29873	1	1	0.8547	0.0464888	15.7158
6552	SUBDIVIDERS AND DEVELOPERS, NEC	2	1	2.5858	0.226512	29.5201	0	0	NA	--	--
6553	CEMETERY SUBDIVIDERS AND DEVELOPERS	6	6	0.9116	0.27476	3.02514	1	1	0.8547	0.0464888	15.7158
67	HOLDING AND OTHER INVESTMENT OFFICES	2	2	0.9115	0.113175	7.34226	0	2	NA	--	--
672	INVESTMENT OFFICES	2	0	NA	--	--	0	0	NA	--	--
673	TRUSTS	0	1	NA	--	--	0	2	NA	--	--
6732	EDUCATIONAL, RELIGIOUS, ETC TRUSTS	0	1	NA	--	--	0	1	NA	--	--
679	MISCELLANEOUS INVESTING	0	1	NA	--	--	0	0	NA	--	--
6799	INVESTORS, NEC	0	1	NA	--	--	0	0	NA	--	--
70	HOTELS, ROOMING HOUSES, CAMPS, AND OTHER LODGNG	33	57	0.5805	0.363859	0.926151	23	17	1.7188	0.820224	3.60191
701	HOTELS AND MOTELS	23	46	0.5075	0.295434	0.871871	19	13	1.6419	0.717042	3.75968
7011	HOTELS AND MOTELS	23	46	0.5075	0.295434	0.871871	19	13	1.6419	0.717042	3.75968
702	ROOMING AND BOARDING HOUSES	0	1	NA	--	--	0	0	NA	--	--
7021	ROOMING AND BOARDING HOUSES	0	1	NA	--	--	0	0	NA	--	--
703	CAMPS AND RECREATIONAL VEHICLE PARKS	9	11	0.7823	0.303518	2.01671	3	4	1.4795	0.282051	7.76082
7032	SPORTING AND RECREATIONAL CAMPS	6	10	0.5852	0.196083	1.74666	3	3	2.3493	0.391641	14.0929
7033	TRAILER PARKS AND CAMPSITES	3	1	2.3846	0.233984	24.304	0	1	NA	--	--
704	ORGANIZATION HOTELS AND LODGING HOUSES ON MEMBERSHIP BASIS	1	0	NA	--	--	1	1	1.7141	0.102933	28.5461
7041	MEMBERSHIP-BASIS ORGANIZATION HOTELS	1	0	NA	--	--	1	1	1.7141	0.102933	28.5461
72	PERSONAL SERVICES	27	28	0.9697	0.547323	1.71834	22	30	0.9691	0.506993	1.85276
721	LAUNDRY, CLEANING AND GARMENT SERVICES	14	14	0.91	0.407404	2.03279	10	6	1.4968	0.497787	4.5012
7211	POWER LAUNDRIES, FAMILY AND COMMERCIAL	4	5	0.7417	0.184404	2.98342	1	4	0.3022	0.0302331	3.02101
7213	LINEN SUPPLY	1	0	NA	--	--	1	0	NA	--	--
7215	COIN-OPERATED LAUNDRIES AND CLEANING	2	3	0.9664	0.145061	6.43908	1	0	NA	--	--
7216	DRYCLEANING PLANTS, EXCEPT RUG	4	4	0.8599	0.19399	3.81246	6	2	2.1914	0.405413	11.8459
7217	CARPET AND UPHOLSTERY CLEANING	2	1	1.0388	0.0746434	14.4584	0	0	NA	--	--
7218	INDUSTRIAL LAUNDERERS	1	1	0.7615	0.0367175	15.7939	0	0	NA	--	--
7219	LAUNDRY AND GARMENT SERVICES, NEC	0	0	NA	--	--	1	0	NA	--	--
722	PHOTOGRAPHIC STUDIOS, PORTRAIT	4	2	1.4839	0.261295	8.42764	2	4	0.8088	0.123313	5.30525
7221	PHOTOGRAPHIC STUDIOS, PORTRAIT	4	2	1.4839	0.261295	8.42764	2	4	0.8088	0.123313	5.30525
723	BEAUTY SHOPS	1	1	1.6216	0.100498	26.1668	6	11	1.1107	0.358514	3.44151
7231	BEAUTY SHOPS	1	1	1.6216	0.100498	26.1668	6	11	1.1107	0.358514	3.44151
724	BARBER SHOPS	2	3	0.7532	0.109562	5.17802	0	0	NA	--	--
7241	BARBER SHOPS	2	3	0.7532	0.109562	5.17802	0	0	NA	--	--
725	SHOE REPAIR SHOPS AND SHOESHINE PARLORS	0	1	NA	--	--	0	1	NA	--	--
7251	SHOE REPAIR AND SHOESHINE PARLORS	0	1	NA	--	--	0	1	NA	--	--
726	FUNERAL SERVICE AND CREMATORIES	3	3	1.3246	0.25601	6.85382	0	0	NA	--	--
7261	FUNERAL SERVICE AND CREMATORIES	3	3	1.3246	0.25601	6.85382	0	0	NA	--	--
729	MISCELLANEOUS PERSONAL SERVICES	3	4	0.8045	0.160701	4.02778	4	8	0.5548	0.140143	2.1971
7291	TAX RETURN PREPARATION SERVICES	0	4	NA	--	--	0	1	NA	--	--
7299	MISCELLANEOUS PERSONAL SERVICES, NEC	3	0	NA	--	--	4	7	0.7164	0.170362	3.01284
73	BUSINESS SERVICES	78	78	1.0348	0.728348	1.47026	21	39	0.6251	0.334042	1.16989
731	ADVERTISING	5	7	0.5322	0.150916	1.87746	0	2	NA	--	--
7311	ADVERTISING AGENCIES	1	3	0.1834	0.0184355	1.82452	0	2	NA	--	--
7312	OUTDOOR ADVERTISING SERVICES	0	1	NA	--	--	0	0	NA	--	--
7313	RADIO/TV/PUBLISHER REPRESENTATIVES	1	1	1.7591	0.108835	28.4354	0	0	NA	--	--
7319	ADVERTISING, NEC	2	1	1.5787	0.0798512	31.2124	0	0	NA	--	--
732	CONSUMER CREDIT REPORTING/MERCANTILE REPORTING/ADJUSTMENT AND COLLECTION AGENCIES	0	2	NA	--	--	2	2	0.686	0.0893486	5.26714
7322	ADJUSTMENT AND COLLECTION SERVICES	0	0	NA	--	--	2	2	0.686	0.0893486	5.26714
7323	CREDIT REPORTING SERVICES	0	2	NA	--	--	0	0	NA	--	--
733	MAILING, REPRODUCTION, COMMERCIAL ART/PHOTOTOGRAPHY, AND STENOGRAPHIC SERVICES	1	6	0.2831	0.0309801	2.58797	0	5	NA	--	--
7331	DIRECT MAIL ADVERTISING SERVICES	0	2	NA	--	--	0	0	NA	--	--
7335	COMMERCIAL PHOTOGRAPHY	1	0	NA	--	--	0	0	NA	--	--
7336	COMMERCIAL ART AND GRAPHIC DESIGN	0	4	NA	--	--	0	1	NA	--	--
7338	SECRETARIAL AND COURT REPORTING	0	0	NA	--	--	0	4	NA	--	--
734	SERVICES TO DWELLINGS AND OTHER BUILDINGS	18	13	1.0825	0.510884	2.29377	6	11	0.6485	0.207233	2.02985
7342	DISINFECTING AND PEST CONTROL SERVICES	1	1	1.0457	0.0611476	17.8831	1	0	NA	--	--
7349	BUILDING MAINTENANCE SERVICES, NEC	17	12	1.0853	0.498085	2.36515	5	11	0.5048	0.15089	1.68931
735	MISCELLANEOUS EQUIPMENT RENTAL AND LEASING	2	2	1.6644	0.210689	13.15	0	0	NA	--	--
7353	HEAVY CONSTRUCTION EQUIPMENT RENTAL	1	1	2.035	0.0980198	42.251	0	0	NA	--	--
7359	EQUIPMENT RENTAL AND LEASING, NEC	1	0	NA	--	--	0	0	NA	--	--
736	PERSONNEL SUPPLY SERVICES	6	6	0.8826	0.265026	2.93972	4	6	0.9543	0.236016	3.85932
7361	EMPLOYMENT AGENCIES	4	3	1.4029	0.295053	6.67121	2	2	1.1257	0.147405	8.59675
7363	HELP SUPPLY SERVICES	2	3	0.443	0.0652818	3.00692	2	4	0.825	0.118622	5.73896
737	COMPUTER PROGRAMMING, DATA PROCESSING, OTHER REPAIR	19	18	1.2197	0.604984	2.45926	3	8	0.52	0.123287	2.19373
7371	COMPUTER PROGRAMMING SERVICES	3	5	0.7942	0.173014	3.64641	0	0	NA	--	--
7372	PREPACKAGED SOFTWARE	1	3	0.3524	0.0319683	3.88608	1	1	4.9021	0.165795	144.947
7373	COMPUTER INTEGRATED SYSTEMS DESIGN	3	2	1.7978	0.265105	12.1929	1	1	1.3636	0.0821136	22.6448
7374	DATA PROCESSING AND PREPARATION	0	0	NA	--	--	0	1	NA	--	--
7375	INFORMATION RETRIEVAL SERVICES	2	0	NA	--	--	0	0	NA	--	--
7377	COMPUTER RENTAL AND LEASING	1	0	NA	--	--	0	0	NA	--	--
7378	COMPUTER MAINTENANCE AND REPAIR	3	1	2.9138	0.273683	31.0234	0	0	NA	--	--
7379	COMPUTER RELATED SERVICES, NEC	1	2	0.3922	0.033544	4.58701	0	0	NA	--	--
738	MISCELLANEOUS BUSINESS SERVICES	35	29	1.2996	0.764259	2.2102	8	12	0.605	0.224477	1.63089
7381	DETECTIVE AND ARMORED CAR SERVICES	8	8	0.9309	0.328858	2.63542	1	3	0.4921	0.0437765	5.5318
7382	SECURITY SYSTEMS SERVICES	1	0	NA	--	--	0	1	NA	--	--
7383	NEWS SYNDICATES	2	1	3.3656	0.302218	37.4827	0	0	NA	--	--
7384	PHOTOFINISHING LABORATORIES	6	3	1.3969	0.313682	6.22157	0	0	NA	--	--
7389	BUSINESS SERVICES, NEC	21	17	1.4139	0.711728	2.80889	7	8	0.7446	0.242878	2.28323
75	AUTOMOTIVE REPAIR, SERVICES AND PARKING	57	66	0.7109	0.478779	1.05559	4	5	0.5187	0.120876	2.22631
751	AUTOMOTIVE RENTAL AND LEASING, WITHOUT DRIVERS	4	5	0.7045	0.173831	2.85584	1	3	0.1529	0.0132133	1.77126
7513	TRUCK RENTAL AND LEASING, NO DRIVERS	1	2	0.3206	0.0253893	4.04835	0	0	NA	--	--
7514	PASSENGER CAR RENTAL	2	3	0.5718	0.0866064	3.77536	1	3	0.1529	0.0132133	1.77126
7519	UTILITY TRAILER RENTAL	1	0	NA	--	--	0	0	NA	--	--
753	AUTOMOTIVE REPAIR SHOPS	51	57	0.7504	0.493688	1.14076	3	2	1.2115	0.177637	8.26281
7532	TOP, BODY REPAIR AND PAINT SHOPS	17	17	1.1384	0.544442	2.3805	0	1	NA	--	--
7533	AUTO EXHAUST SYSTEM REPAIR SHOPS	1	0	NA	--	--	0	0	NA	--	--
7534	TIRE RETREADING AND REPAIR SHOPS	2	4	0.4855	0.079925	2.94919	0	0	NA	--	--
7536	AUTOMOTIVE GLASS REPLACEMENT SHOPS	1	1	1.3074	0.0452395	37.7865	0	1	NA	--	--
7537	AUTOMOTIVE TRANSMISSION REPAIR SHOPS	1	3	0.2057	0.0195258	2.16735	0	0	NA	--	--
7538	GENERAL AUTOMOTIVE REPAIR SHOPS	29	26	0.8446	0.47696	1.49568	2	0	NA	--	--
7539	AUTOMOTIVE REPAIR SHOPS, NEC	3	6	0.3824	0.0910303	1.60668	0	0	NA	--	--
754	AUTOMOTIVE SERVICES, EXCEPT REPAIR	2	6	0.1717	0.0316258	0.932556	0	0	NA	--	--
7542	CARWASHES	0	3	NA	--	--	0	0	NA	--	--
7549	AUTOMOTIVE SERVICES, NEC	2	3	0.4	0.0557012	2.87349	0	0	NA	--	--
76	MISCELLANEOUS REPAIR SERVICES	41	29	1.4505	0.867283	2.4262	2	5	0.3003	0.0496649	1.81603
762	ELECTRICAL REPAIR SHOPS	20	14	1.2765	0.614636	2.65124	0	2	NA	--	--
7622	RADIO AND TELEVISION REPAIR	7	7	0.7138	0.236436	2.15551	0	0	NA	--	--
7623	REFRIGERATION SERVICE AND REPAIR	1	3	0.1757	0.015817	1.95236	0	0	NA	--	--
7629	ELECTRICAL REPAIR SHOPS, NEC	12	4	3.3212	1.01493	10.8682	0	2	NA	--	--
763	WATCH, CLOCK AND JEWELRY REPAIR	0	1	NA	--	--	0	0	NA	--	--
7631	WATCH, CLOCK AND JEWELRY REPAIR	0	1	NA	--	--	0	0	NA	--	--
764	REUPHOLSTERY AND FURNITURE REPAIR	4	3	1.8439	0.353497	9.6187	1	1	0.5606	0.0332935	9.43985
7641	REUPHOLSTERY AND FURNITURE REPAIR	4	3	1.8439	0.353497	9.6187	1	1	0.5606	0.0332935	9.43985
769	MISCELLANEOUS REPAIR SHOPS AND RELATED SERVICES	17	11	1.7472	0.780263	3.91274	1	2	0.643	0.0339156	12.1929
7692	WELDING REPAIR	1	0	NA	--	--	1	0	NA	--	--
7694	ARMATURE REWINDING SHOPS	0	2	NA	--	--	0	0	NA	--	--
7699	REPAIR SERVICES, NEC	16	9	1.9903	0.83691	4.73356	0	2	NA	--	--
78	MOTION PICTURES	8	8	1.0803	0.387322	3.0132	6	4	1.8964	0.487295	7.38031
781	MOTION PICTURE PRODUCTION AND ALLIED SERVICES	2	2	1.3175	0.180666	9.60808	0	0	NA	--	--
7812	MOTION PICTURE AND VIDEO PRODUCTION	0	2	NA	--	--	0	0	NA	--	--
7819	SERVICES ALLIED TO MOTION PICTURES	2	0	NA	--	--	0	0	NA	--	--
782	MOTION PICTURE DISTRIBUTION ALLIED SERVICES	1	1	1.659	0.102602	26.8276	0	0	NA	--	--
7822	MOTION PICTURE AND TAPE DISTRIBUTION	1	0	NA	--	--	0	0	NA	--	--
783	MOTION PICTURE THEATERS	4	5	0.6411	0.160007	2.56946	5	3	2.5785	0.562827	11.813
7832	MOTION PICTURE THEATERS, EXCEPT DRIVE-IN	4	3	1.2994	0.269771	6.25885	5	3	2.5785	0.562827	11.813
7833	DRIVE-IN MOTION PICTURE THEATERS	0	2	NA	--	--	0	0	NA	--	--
784	VIDEO TAPE RENTAL	1	0	NA	--	--	1	1	0.5722	0.03497	9.36304
7841	VIDEO TAPE RENTAL	1	0	NA	--	--	1	1	0.5722	0.03497	9.36304
79	AMUSEMENT AND RECREATIONAL SERVICES	43	61	0.7587	0.493393	1.16672	9	16	0.7549	0.2951	1.93161
791	DANCE STUDIOS, SCHOOLS AND HALLS	0	0	NA	--	--	0	2	NA	--	--
7911	DANCE STUDIOS, SCHOOLS AND HALLS	0	0	NA	--	--	0	2	NA	--	--
792	THEATRICAL PRODUCERS (EXCEPT MOTION PICTURES)	8	5	1.0351	0.323817	3.30896	1	3	0.6811	0.0553765	8.37719
7922	THEATRICAL PRODUCERS AND SERVICES	3	1	1.8772	0.178216	19.7732	1	2	1.4023	0.0790405	24.88
7929	ENTERTAINERS AND ENTERTAINMENT GROUPS	5	4	0.8262	0.212369	3.21485	0	1	NA	--	--
793	BOWLING CENTERS	6	4	1.7485	0.448965	6.81029	1	2	0.7206	0.0531791	9.76712
7933	BOWLING CENTERS	6	4	1.7485	0.448965	6.81029	1	2	0.7206	0.0531791	9.76712
794	COMMERCIAL SPORTS	6	12	0.6948	0.244929	1.9715	0	0	NA	--	--
7941	SPORTS CLUBS, MANAGERS AND PROMOTERS	3	2	3.9819	0.621093	25.5286	0	0	NA	--	--
7948	RACING, INCLUDING TRACK OPERATION	3	10	0.3254	0.0850284	1.24554	0	0	NA	--	--
799	MISCELLANEOUS AMUSEMENT AND RECREATION SERVICES	24	41	0.6573	0.379849	1.13756	7	9	1.0243	0.334234	3.13966
7991	PHYSICAL FITNESS FACILITIES	0	1	NA	--	--	0	2	NA	--	--
7992	PUBLIC GOLF COURSES	2	9	0.2713	0.0554387	1.32864	0	0	NA	--	--
7996	AMUSEMENT PARKS	2	2	1.1506	0.153035	8.65179	0	0	NA	--	--
7997	MEMBERSHIP SPORTS AND RECREATION CLUBS	10	13	0.7393	0.299876	1.82301	3	0	NA	--	--
7999	AMUSEMENT AND RECREATION, NEC	11	17	0.9157	0.405691	2.06689	4	7	0.6853	0.181673	2.58519
80	HEALTH SERVICES	59	73	1.0099	0.687846	1.4828	77	119	0.667	0.450097	0.988472
801	OFFICES AND CLINICS OF DOCTORS OF MEDICINE	4	6	1.3118	0.343872	5.00477	8	16	0.6878	0.266538	1.77489
8011	OFFICES AND CLINICS OF MEDICAL DOCTORS	4	6	1.3118	0.343872	5.00477	8	16	0.6878	0.266538	1.77489
802	OFFICES AND CLINICS OF DENTISTS	1	4	0.733	0.0772423	6.95724	3	10	0.4362	0.106251	1.79136
8021	OFFICES AND CLINICS OF DENTISTS	1	4	0.733	0.0772423	6.95724	3	10	0.4362	0.106251	1.79136
804	OFFICES AND CLINICS OF OTHER HEALTH PRACTITIONERS	1	5	0.3169	0.0361061	2.78179	5	8	0.7919	0.221658	2.82958
8041	OFFICES AND CLINICS OF CHIROPRACTORS	0	0	NA	--	--	2	1	2.7078	0.236499	31.0037
8042	OFFICES AND CLINICS OF OPTOMETRISTS	0	0	NA	--	--	1	0	NA	--	--
8049	OFFICES OF HEALTH PRACTITIONERS, NEC	1	5	0.3169	0.0361061	2.78179	2	7	0.2513	0.0432388	1.46118
805	NURSING AND PERSONAL CARE FACILITIES	4	15	0.3053	0.0964517	0.96665	32	32	0.986	0.550689	1.76542
8059	NURSING AND PERSONAL CARE, NEC	1	7	0.2316	0.0268976	1.99582	1	3	0.2615	0.024193	2.82806
806	HOSPITALS	46	46	1.2994	0.825037	2.04656	46	74	0.7705	0.489505	1.21302
8062	GENERAL MEDICAL AND SURGICAL HOSPITALS	1	3	0.7469	0.0741181	7.52849	5	3	2.4083	0.509014	11.3952
8063	PSYCHIATRIC HOSPITALS	11	9	1.9242	0.749103	4.9431	5	2	2.0495	0.321922	13.049
8069	SPECIALTY HOSPITALS, EXCEPT PSYCHIATRIC	0	3	NA	--	--	2	7	0.3822	0.0675494	2.16255
807	MEDICAL AND DENTAL LABORATORIES	2	5	0.286	0.0494369	1.6556	2	0	NA	--	--
8071	MEDICAL LABORATORIES	0	0	NA	--	--	2	0	NA	--	--
8072	DENTAL LABORATORIES	2	5	0.286	0.0494369	1.6556	0	0	NA	--	--
808	HOME HEALTH CARE SERVICES	3	4	0.961	0.201038	4.59459	7	10	0.4538	0.150367	1.37014
8082	HOME HEALTH CARE SERVICES	3	4	0.961	0.201038	4.59459	7	10	0.4538	0.150367	1.37014
809	MISC HEALTH AND ALLIED SERVICES, NEC	4	0	NA	--	--	3	2	1.431	0.227066	9.01959
8092	KIDNEY DIALYSIS CENTERS	0	0	NA	--	--	1	0	NA	--	--
8093	SPECIALTY OUTPATIENT CLINICS, NEC	3	0	NA	--	--	1	1	0.8538	0.0480837	15.1628
8099	HEALTH AND ALLIED SERVICES, NEC	1	0	NA	--	--	1	1	1.0985	0.065151	18.5241
81	LEGAL SERVICES	9	10	1.6984	0.645967	4.46601	11	7	2.4237	0.846059	6.94321
811	LEGAL SERVICES	9	10	1.6984	0.645967	4.46601	11	7	2.4237	0.846059	6.94321
8111	LEGAL SERVICES	9	10	1.6984	0.645967	4.46601	11	7	2.4237	0.846059	6.94321
82	EDUCATIONAL SERVICES	133	175	0.9871	0.757198	1.28682	66	123	0.74	0.496277	1.10354
821	ELEMENTARY AND SECONDARY SCHOOLS	80	115	0.8732	0.631719	1.207	48	86	0.9341	0.596809	1.46219
8211	ELEMENTARY AND SECONDARY SCHOOLS	80	115	0.8732	0.631719	1.207	48	86	0.9341	0.596809	1.46219
822	COLLEGES, UNIVERSITIES, PROFESSIONAL SCHOOL, JUNIOR COLLEGE	54	64	1.2354	0.825962	1.84799	16	46	0.4325	0.224626	0.832806
8221	COLLEGES AND UNIVERSITIES	52	61	1.2306	0.816216	1.85547	16	43	0.4731	0.244454	0.915932
8222	JUNIOR COLLEGES	4	5	1.4142	0.350657	5.70406	0	6	NA	--	--
823	LIBRARIES	1	2	0.8115	0.0650983	10.117	3	13	0.3581	0.0909423	1.41031
8231	LIBRARIES	1	2	0.8115	0.0650983	10.117	3	13	0.3581	0.0909423	1.41031
824	VOCATIONAL SCHOOLS	6	5	1.4545	0.41608	5.08514	1	3	1.2813	0.112154	14.6393
8244	BUSINESS AND SECRETARIAL SCHOOLS	1	0	NA	--	--	0	0	NA	--	--
8249	VOCATIONAL SCHOOLS, NEC	4	5	1.0461	0.261389	4.18688	1	3	1.2813	0.112154	14.6393
829	SCHOOLS AND EDUCATIONAL SERVICES, NEC	11	12	1.1622	0.484103	2.79052	7	10	1.8011	0.607613	5.33931
8299	SCHOOLS AND EDUCATIONAL SERVICES, NEC	11	12	1.1622	0.484103	2.79052	7	10	1.8011	0.607613	5.33931
83	SOCIAL SERVICES	25	23	0.9392	0.508182	1.73582	35	39	1.2025	0.694874	2.08105
832	INDIVIDUAL AND FAMILY SOCIAL SERVICES	12	7	1.3981	0.516548	3.78466	12	16	0.6784	0.28631	1.60781
8322	INDIVIDUAL AND FAMILY SERVICES	12	7	1.3981	0.516548	3.78466	12	16	0.6784	0.28631	1.60781
833	JOB TRAINING AND VOCATIONAL REHAB SERVICES	5	3	2.0309	0.417249	9.8856	3	3	0.7646	0.110992	5.26747
8331	JOB TRAINING AND RELATED SERVICES	5	3	2.0309	0.417249	9.8856	3	3	0.7646	0.110992	5.26747
835	CHILD DAY CARE SERVICES	1	1	1.0049	0.0603964	16.722	10	19	0.8804	0.373746	2.07394
8351	CHILD DAY CARE SERVICES	1	1	1.0049	0.0603964	16.722	10	19	0.8804	0.373746	2.07394
836	RESIDENTIAL CARE	5	9	0.5827	0.177955	1.90818	11	4	3.5153	0.968905	12.7544
8361	RESIDENTIAL CARE	5	9	0.5827	0.177955	1.90818	11	4	3.5153	0.968905	12.7544
839	SOCIAL SERVICES, NEC	4	8	0.3789	0.107539	1.33501	3	5	1.1076	0.223286	5.49433
8399	SOCIAL SERVICES, NEC	4	8	0.3789	0.107539	1.33501	3	5	1.1076	0.223286	5.49433
84	MUSEUMS, ART GALLERIES, BOTANICAL & ZOOLOGICAL GARDENS	3	4	0.7893	0.149893	4.15654	2	4	0.8317	0.135082	5.12174
841	MUSEUMS AND ART GALLERIES	2	4	0.6386	0.103198	3.9522	2	4	0.8317	0.135082	5.12174
8412	MUSEUMS AND ART GALLERIES	2	4	0.6386	0.103198	3.9522	2	4	0.8317	0.135082	5.12174
842	ARBORETA AND BOTANICAL ZOOLOGICAL GARDENS	1	0	NA	--	--	0	0	NA	--	--
8422	BOTANICAL AND ZOOLOGICAL GARDENS	1	0	NA	--	--	0	0	NA	--	--
86	MEMBERSHIP ORGANIZATIONS	28	29	1.1887	0.676988	2.08729	11	10	1.3195	0.521765	3.33692
861	BUSINESS ASSOCIATIONS	3	4	0.7116	0.15285	3.31355	2	3	0.9944	0.153881	6.42632
8611	BUSINESS ASSOCIATIONS	3	4	0.7116	0.15285	3.31355	2	3	0.9944	0.153881	6.42632
862	PROFESSIONAL MEMBERSHIP ORGANIZATIONS	0	1	NA	--	--	0	0	NA	--	--
8621	PROFESSIONAL ORGANIZATIONS	0	1	NA	--	--	0	0	NA	--	--
863	LABOR UNIONS AND SIMILAR LABOR ORGANIZATION	4	2	1.8421	0.309875	10.9509	1	0	NA	--	--
8631	LABOR ORGANIZATIONS	4	2	1.8421	0.309875	10.9509	1	0	NA	--	--
864	CIVIC, SOCIAL AND FRATERNAL ASSOCIATIONS	6	6	1.5495	0.453357	5.29607	3	1	2.8714	0.275416	29.9377
8641	CIVIC AND SOCIAL ASSOCIATIONS	6	6	1.5495	0.453357	5.29607	3	1	2.8714	0.275416	29.9377
866	RELIGIOUS ORGANIZATIONS	13	17	0.9894	0.454602	2.15357	4	6	0.7814	0.195181	3.12842
8661	RELIGIOUS ORGANIZATIONS	13	17	0.9894	0.454602	2.15357	4	6	0.7814	0.195181	3.12842
869	MEMBERSHIP ORGANIZATIONS, NEC	2	0	NA	--	--	1	1	1.08	0.0479402	24.3324
8699	MEMBERSHIP ORGANIZATIONS, NEC	2	0	NA	--	--	1	1	1.08	0.0479402	24.3324
87	ENGINEERING AND MANAGEMENT SERVICES	51	71	0.9192	0.619763	1.36358	9	22	0.5027	0.211841	1.19327
871	ENGINEERING, ARCHITECTURAL & SURVEYING SERVICES	29	33	1.0596	0.618034	1.81693	1	4	0.4209	0.0366786	4.83032
8711	ENGINEERING SERVICES	22	18	1.3765	0.704072	2.69145	1	0	NA	--	--
8712	ARCHITECTURAL SERVICES	4	7	0.8263	0.223644	3.05355	0	4	NA	--	--
8713	SURVEYING SERVICES	6	11	0.6952	0.243894	1.98203	0	0	NA	--	--
872	ACCOUNTING, AUDITING & BOOKKEEPING SERVICES	4	8	0.5824	0.165473	2.05051	3	4	0.7165	0.14458	3.55114
8721	ACCOUNTING, AUDITING AND BOOKKEEPING	4	8	0.5824	0.165473	2.05051	3	4	0.7165	0.14458	3.55114
873	RESEARCH, DEVELOPMENT AND TESTING SERVICES	12	23	0.6119	0.290494	1.2892	4	12	0.452	0.131586	1.55315
8731	COMMERCIAL PHYSICAL RESEARCH	6	13	0.5306	0.194362	1.44897	4	3	1.4505	0.293508	7.16839
8732	COMMERCIAL NONPHYSICAL RESEARCH	1	2	0.8375	0.074743	9.38429	0	4	NA	--	--
8733	NONCOMMERCIAL RESEARCH ORGANIZATIONS	3	3	1.3414	0.210909	8.53172	0	4	NA	--	--
8734	TESTING LABORATORIES	2	6	0.3577	0.0651311	1.96487	0	1	NA	--	--
874	MANAGEMENT AND PUBLIC RELATIONS SERVICES	8	12	1.0994	0.427248	2.82934	1	3	0.407	0.0375514	4.413
8741	MANAGEMENT SERVICES	0	2	NA	--	--	0	0	NA	--	--
8742	MANAGEMENT CONSULTING SERVICES	5	2	3.4497	0.605678	19.649	1	2	0.5342	0.042339	6.74032
8744	FACILITIES SUPPORT SERVICES	0	1	NA	--	--	0	0	NA	--	--
8748	BUSINESS CONSULTING, NEC	1	4	0.5498	0.0567804	5.32387	0	0	NA	--	--
88	PRIVATE HOUSEHOLDS	5	3	2.0835	0.444498	9.76643	11	10	1.6231	0.626567	4.20461
881	PRIVATE HOUSEHOLDS	5	3	2.0835	0.444498	9.76643	11	10	1.6231	0.626567	4.20461
8811	PRIVATE HOUSEHOLDS	5	3	2.0835	0.444498	9.76643	11	10	1.6231	0.626567	4.20461
89	MISCELLANEOUS SERVICES	5	10	0.698	0.224387	2.17166	3	2	1.4309	0.197276	10.3796
899	SERVICES, NEC	5	10	0.698	0.224387	2.17166	3	2	1.4309	0.197276	10.3796
8999	SERVICES, NEC	5	10	0.698	0.224387	2.17166	3	2	1.4309	0.197276	10.3796
91	EXECUTIVE, LEGISLATIVE & GENERAL GOVERNMENT	11	16	0.9501	0.412711	2.1873	13	11	1.9956	0.813666	4.89456
911	EXECUTIVE OFFICES	1	1	2.9513	0.173116	50.3156	1	1	2.2854	0.103399	50.5156
9111	EXECUTIVE OFFICES	1	1	2.9513	0.173116	50.3156	1	1	2.2854	0.103399	50.5156
912	LEGISLATIVE BODIES	3	6	0.7825	0.176805	3.46384	1	2	0.7029	0.0517366	9.55113
9121	LEGISLATIVE BODIES	3	6	0.7825	0.176805	3.46384	1	2	0.7029	0.0517366	9.55113
913	EXECUTIVE AND LEGISLATIVE OFFICES COMBINED	0	2	NA	--	--	6	4	2.7595	0.709074	10.7393
9131	EXECUTIVE AND LEGISLATIVE COMBINED	0	1	NA	--	--	6	4	2.7595	0.709074	10.7393
919	GENERAL GOVERNMENT, NEC	7	8	1.012	0.338185	3.02859	4	2	3.9365	0.575921	26.9078
9199	GENERAL GOVERNMENT, NEC	7	8	1.012	0.338185	3.02859	4	2	3.9365	0.575921	26.9078
92	JUSTICE, PUBLIC ORDER AND SAFETY	43	56	0.8369	0.541716	1.2931	5	10	0.5683	0.178979	1.80454
921	COURTS	1	1	2.5848	0.144119	46.3623	2	3	0.5958	0.090003	3.94451
9211	COURTS	1	1	2.5848	0.144119	46.3623	2	3	0.5958	0.090003	3.94451
922	PUBLIC ORDER AND SAFETY	42	56	0.8111	0.523673	1.25644	3	7	0.5614	0.13273	2.3748
9221	POLICE PROTECTION	17	24	0.7485	0.384868	1.45581	2	3	0.8946	0.133621	5.99006
9222	LEGAL COUNSEL AND PROSECUTION	1	3	0.7486	0.0646671	8.66744	0	1	NA	--	--
9223	CORRECTIONAL INSTITUTIONS	14	10	1.3071	0.550926	3.10149	1	2	0.5932	0.0416277	8.45454
9224	FIRE PROTECTION	11	18	0.6871	0.309295	1.52653	0	0	NA	--	--
9229	PUBLIC ORDER AND SAFETY, NEC	2	2	1.1289	0.137261	9.2849	0	1	NA	--	--
93	FINANCE, TAXATION AND MONETARY POLICY	7	3	2.0362	0.5031	8.2413	5	9	0.6344	0.191015	2.10707
931	PUBLIC FINANCE, TAXATION & MONETARY POLICY	7	3	2.0362	0.5031	8.2413	5	9	0.6344	0.191015	2.10707
9311	FINANCE, TAXATION AND MONETARY POLICY	7	3	2.0362	0.5031	8.2413	5	9	0.6344	0.191015	2.10707
94	ADMINISTRATION OF HUMAN RESOURCES	13	8	1.9376	0.744703	5.04146	7	7	1.7452	0.532373	5.72153
941	ADMINISTRATION OF EDUCATIONAL PROGRAMS	1	2	1.1159	0.096125	12.956	0	0	NA	--	--
9411	ADMINISTRATION OF EDUCATIONAL PROGRAMS	1	2	1.1159	0.096125	12.956	0	0	NA	--	--
943	ADMINISTRATION OF PUBLIC HEALTH PROGRAMS	6	0	NA	--	--	2	2	1.3239	0.159929	10.9598
9431	ADMIN OF PUBLIC HEALTH PROGRAMS	6	0	NA	--	--	2	2	1.3239	0.159929	10.9598
944	ADMINISTRATION OF SOCIAL, HUMAN RESOURCE AND INCOME MAINTENANCE PROGRAMS	5	6	0.8564	0.235996	3.10837	4	5	1.4072	0.30751	6.43966
9441	ADMINISTRATION OF SOCIAL AND MANPOWER PROGRAMS	5	6	0.8564	0.235996	3.10837	4	5	1.4072	0.30751	6.43966
945	ADMINISTRATION OF VETERANS AFFAIRS, EXCEPT HEALTH INSR	1	1	1.4975	0.0927417	24.1824	1	0	NA	--	--
9451	ADMINISTRATION OF VETERANS AFFAIRS	1	1	1.4975	0.0927417	24.1824	1	0	NA	--	--
95	ENVIRONMENTAL QUALITY AND HOUSING	15	19	0.8853	0.423698	1.8501	3	3	2.9045	0.532535	15.8422
951	ADMINISTRATION OF ENVIRONMENTAL QUALITY PRORAMS	10	12	0.9789	0.394657	2.42814	0	2	NA	--	--
9511	AIR, WATER AND SOLID WASTE MANAGEMENT	3	6	0.7644	0.176188	3.31724	0	2	NA	--	--
9512	LAND, MINERAL AND WILDLIFE CONSERVATION	8	6	1.3889	0.44588	4.32674	0	1	NA	--	--
953	ADMINISTRATION OF HOUSING URBAN DEVELOPENT PROGRAMS	5	8	0.6639	0.197414	2.23309	3	1	8.4555	0.766435	93.2842
9531	HOUSING PROGRAMS	3	4	0.5658	0.110946	2.88555	1	0	NA	--	--
9532	URBAN AND COMMUNITY DEVELOPMENT	2	4	0.6931	0.114238	4.2052	2	1	6.0685	0.457484	80.4984
96	ADMINISTRATION OF ECONOMIC PROGRAMS	28	24	1.2608	0.698311	2.27645	2	5	0.6622	0.113716	3.85652
961	ADMINISTRATION OF GENERAL ECONOMIC PROGRAMS	6	0	NA	--	--	0	1	NA	--	--
9611	ADMINISTRATION OF GENERAL ECONOMIC PROGRAMS	6	0	NA	--	--	0	1	NA	--	--
962	REGULATION AND ADMINISTRATION OF TRANSPORTAION PROGRAMS	15	15	1.1764	0.540643	2.55981	2	2	1.3167	0.159593	10.8637
9621	REGULATION AND ADMINISTRATION OF TRANSPORTATION PROGRAMS	15	15	1.1764	0.540643	2.55981	2	2	1.3167	0.159593	10.8637
963	REGULATION AND ADMINISTRATION OF COMMUNICATONS, ELECTRIC, GAS, AND OTHER UTILITIES	1	1	1.1649	0.065962	20.5758	0	0	NA	--	--
9631	REGULATION AND ADMINISTRATION OF COMMUNICATONS, ELECTRIC, GAS, AND OTHER UTILITIES	1	1	1.1649	0.065962	20.5758	0	0	NA	--	--
964	REGULATION AGRICULTURAL MARKETING AND COMMODITIES	6	6	1.0561	0.313427	3.55893	0	1	NA	--	--
9641	REGULATION OF AGRICULTURAL MARKETING	6	6	1.0561	0.313427	3.55893	0	1	NA	--	--
965	REGULATION, LICENSING, AND INSPECTION OF MISC COMMERCIAL SECTORS	1	2	0.4778	0.0423192	5.39637	0	1	NA	--	--
9651	REGULATION, LICENSING, AND INSPECTION OF MISC COMMERCIAL SECTORS	1	2	0.4778	0.0423192	5.39637	0	1	NA	--	--
966	SPACE RESEARCH AND TECHNOLOGY	2	0	NA	--	--	0	0	NA	--	--
9661	SPACE RESEARCH AND TECHNOLOGY	2	0	NA	--	--	0	0	NA	--	--
97	NATIONAL SECURITY AND INTERNATIONAL AFFAIRS	478	498	1.1319	0.9261	1.38348	11	12	0.9494	0.384834	2.34267
971	NATIONAL SECURITY	476	496	1.1265	0.92167	1.37698	10	7	1.5476	0.542085	4.41868
9711	NATIONAL SECURITY	476	496	1.1265	0.92167	1.37698	10	7	1.5476	0.542085	4.41868
972	INTERNATIONAL AFFAIRS	2	1	2.2722	0.194008	26.6127	1	4	0.2524	0.0238925	2.66818
9721	INTERNATIONAL AFFAIRS	2	1	2.2722	0.194008	26.6127	1	4	0.2524	0.0238925	2.66818
	CI=95% Confidence interval; OR=odds ratio; NA=Not Applicable; NEC=Not Elsewhere Classified; SIC=Standard Industrial Classification
	(a) Adjusted for age at reference date (<55, 55-64, 65-74, 75+ years), race (white only, Native American/white, other races), Hispanic ethnicity (yes/no), state (Maine,
	Vermont, New Hampshire), smoking status (never, occasional [<100 cigarettes over lifetime], former, current), and employment in high-risk occupations other than the one being
	analyzed (yes/no).
